# Supplementary material for: USP7 inhibits FOXO1 activity downstream of the BCR in chronic lymphocytic leukaemia cells to enhance cell survival
Source: Research Square preprint supplement (doi:10.21203/rs.3.rs-7358564/v1), 2025-08-21

**Supplemental Data File for:**

**USP7 inhibits FOXO1 activity downstream of the BCR in chronic lymphocytic leukaemia cells to enhance cell survival**

Hassan N.B. Almuhanna1, Jodie Hay1, Michael Moles1, Jennifer Cassels1, Alison Sefcick2, Alison M. McCaig1,3, Heather G. Jørgensen1, Alison M. Michie1

1Institute of Cancer Sciences, College of Medicine, Veterinary and Life Sciences,

University of Glasgow, Glasgow UK; 2NHS Greater Glasgow & Clyde Royal Alexandra Hospital, Paisley, UK; 3NHS Greater Glasgow & Clyde Queen Elizabeth University Hospital, Glasgow, UK.

Supplementary Methods:

*Western blotting*: Protein lysates were prepared in 30 – 50 µL lysis buffer (20 mM Tris pH 7.4, 2 mM EDTA, 1% Triton, 1 mM DTT) containing protease inhibitor cocktail and phosphatase inhibitor cocktail (Roche) and incubated on ice for 30 min. The concentration of protein lysates was determined using bicinchoninic acid assay (BCA) protein assay kit (Pierce, ThermoFisher Scientific), following the manufacturer instructions. Protein electrophoresis was performed using NuPAGE® Novex® pre-cast 4-12% Bis-Tris gels with Invitrogen Xcell SureLockTM Mini cell system and all the buffers used were purchased from Invitrogen. PVDF membranes were blocked with 5% non-fat milk in Tris-buffered saline with 0.1% Tween ® 20 detergent (TBST) (10 mM Tris-HCl, 50 mM NaCl, 0.1% Tween 20 (pH7.4)). List of antibodies are listed in Supplementary Table 3. Immunodetection was carried out using the Immobilon® Forte Western HRP Substrate (Sigma) by Li-Cor Odyssey® andwere further analysed in Image StudioTM Lite v5.2 software with densitometry carried out following the manufacturer instructions.

*Flow Cytometry*: For apoptosis analysis, 5-10x105 treated cells were washed and pelleted in HBSS (ThermoFisher Scientific) at RT. Cells were incubated in 100 µl HBSS containing 2.5 µl Annexin V and 2.5 µl 7AAD (BD Biosciences) for 15 min at RT in the dark and then quenched with 200 µL HBSS before analysis. For cell proliferation, cells were stained with CellTrace™ Violet stock solution (Invitrogen, Paisley, UK) as per the manufacturer’s protocol. MEC1 cells were passaged and then seeded into appropriate plate at (1 x 106/ condition). For cell cycle analysis, 1 x 106 treated MEC1 cells were fixed and permeabilized by adding 1 ml cold 80% ethanol dropwise to the pellet. After washing the samples, 400µl propidium iodide (PI)/RNAse Staining Buffer (BD Biosciences) was added and the cells were incubated at RT in the dark for 15 min before analysis. All data were acquired on a FACSCantoII with BD FACSDiva software and analysed using FlowJo software (Tree Star Inc., OR).

*Cellular Fractionation:* The nuclear and cytoplasmic protein were generated by using Nuclear Extraction Kit (Active Motif), with 7-10 x 106/condition for primary CLL cells or 1-2 x 106/condition for MEC1 cells (1). An aliquot of WCL was used as a control. The cells were mildly lysed with 50 µL 1x hypotonic buffer for 15 min on ice, followed by the addition of detergent at a ratio of 1:20 of hypotonic buffer and vortex for 10 sec to generate the cytoplasmic fraction. The nuclear fraction was then generated by adding 50 µL complete lysis buffer, and incubated for 30 min on ice. Protein lysates were denatured and immunoblotted as described.

*FOXO1 activity:* FOXO1 transcription factor activity was quantified using a DNA-binding ELISA 96 plate TransAM® FKHR (FOXO1) Transcription Factor ELISA Kit (Active Motif), using the nuclear fraction of cells (2). The FOXO1 activity kit was followed according to the manual provided by the manufacturer. The protein content of the nuclear fraction was quantified and an equal concentration (10-15 µg) was used for all samples. The absorbance was read at 450 nm using SpectraMax M5 microplate reader (Molecular Devices).

*qRT-PCR*: RNA was extracted using the RNA-Easy mini kit following the manufacturer’s instructions (QIAGEN). cDNA synthesis was prepared with the SuperScriptTM III Reverse Transcriptase kit (ThermoFisher Scientific) using 500 ng/condition of RNA. qPCR was carried out using a TaqMan® 2X Universal PCR Master Mix (ThermoFisher Scientific), on a MicroAmpTM Optical 384 reaction plate in triplicate, and run on the 7900HT Fast Real-Time PCR system (Applied Biosystems, Warrington, UK), programmed to complete 40 cycles. Each cycle consisted of 50° C for 2 min, 95° C for 10 min, 95° C for 15 sec, and 60° C for 1 min. The results were analysed using Sequence Detection Systems software v 2.3 (Applied Biosystems). The cycle threshold (Ct) was calculated for reference gene and target gene. The results were expressed as ∆∆Ct. The primers used are listed in Supplementary Table 5.

**References:**

1. Hay J, Moles MW, Cassels J, Michie AM. Subcellular fractionation of primary chronic lymphocytic leukaemia cells to monitor nuclear/cytoplasmic protein trafficking. J Vis Exp. 2019;152:doi: 10.3791/60426.

2. Cosimo E, Tarafdar A, Moles MW, Holroyd AK, Malik N, Catherwood MA, et al. AKT/mTORC2 inhibition activates FOXO1 function in CLL cells reducing B-cell receptor-mediated survival. Clin Cancer Res. 2019;25(5):1574-87.

| CLL ID | Sex | Binet Stagea | Treatmentb | Cytogenetics |
| --- | --- | --- | --- | --- |
| CLL8 | F | A | UT | del(11q) |
| CLL9 | F | A | T | - |
| CLL57 | M | C | UT | - |
| CLL78 | M | - | T | del(17p) |
| CLL93 | M | C | T | del(17p) |
| CLL102 | F | C | T | del(11q) |
| CLL109 | M | B | - | del(17p) |
| CLL116 | M | A | UT | Normal |
| CLL122 | M | - | T | del(17p) |
| CLL132 | F | B | UT | del(17p) |
| CLL138 | F | A | T | - |
| CLL140 | F | C | UT | T12 |
| CLL151 | M | B | UT | del(11q) |
| CLL162 | M | - | - | - |
| CLL163 | M | - | - | - |
| CLL168 | M | B | UT | T12 / del(13q) |
| CLL169 | F | C | UT | del(11q) |
| CLL170 | F | - | T | - |
| CLL171 | M | C | UT | - |
| CLL172 | M | - | - | Normal |
| CLL173 | M | B | T | del(11q) |
| CLL175 | M | C | T | - |
| CLL176 | M | A | UT | - |
| CLL177 | M | B | UT | - |
| CLL179 | M | B | T | - |
| CLL180 | F | B | T | - |
| CLL184 | M | - | T | - |
| CLL185 | M | C | - | - |
| CLL186 | M | C | UT | - |
| CLL187 | M | B | UT | - |
| CLL189 | M | B | T | - |
| CLL190 | M | C | UT | - |
| CLL191 | M | A | UT | del(11q) / del(17p) |
| CLL193 | F | A | UT | - |
| CLL194 | M | C | UT | - |
| CLL195 | M | C | UT | - |
| CLL196 | F | B | UT | - |
| CLL198 | M | - | T | - |
| CLL200 | M | C | - | - |

Supplemental Table 1. CLL patient clinical characteristics.

a Binet staging: Stage A = mild, B = intermediate, C = advanced; b If previously undergone treatment, it was not within three months of sample collection; T = Treated, UT = Untreated; - = not determined. Normal = no cytogenetic abnormality detected by FISH.

| Inhibitor | Stock Concentration | M.Wta | Diluent | Working conc. for primary CLL cellsb | Working conc. for CLL cell linesb |
| --- | --- | --- | --- | --- | --- |
| Ibrutinib | 10 mM | 440.5 | DMSO | 1 µM | 1 µM |
| P5091 | 10 mM | 348.22 | DMSO | 2 µM | 10 µM |
| HBX19818 | 10 mM | 421.96 | DMSO | 8 µM | 10 µM |
| PR-619 | 50 mM | 223.28 | DMSO | 2 µM | 3 µM |

**Supplemental Table 2: Preparation of Inhibitors for use in this study.**

a Molecular Weight; b Concentration of inhibitors used in the experiments, unless otherwise stated.

| Specificity | Species | Dilution | Diluent | Cat. No. | Manufacturer |
| --- | --- | --- | --- | --- | --- |
| AKT | **Rabbit** | **1:2000** | **5% BSA** | **9272** | **CST** |
| p-AKT (Ser473) | **Rabbit** | **1:2000** | **5% BSA** | **4060** | **CST** |
| β-Actin* | **Rabbit** | **1:1000** | **5% BSA** | **3700** | **CST** |
| FOXO1# | **Rabbit** | **1:1000** | **5% BSA** | **2880** | **CST** |
| p-FOXO1 (Thr24) | **Rabbit** | **1:1000** | **5% BSA** | **9464** | **CST** |
| GAPDH* | **Rabbit** | **1:1000** | **5% Milk** | **5174** | **CST** |
| HAUSP/USP7# | **Rabbit** | **1:1000** | **5% BSA** | **4833** | **CST** |
| Lamin A/C* | **Rabbit** | **1:1000** | **5% BSA** | **2032** | **CST** |
| β-Tubulin* | **Rabbit** | **1:1000** | **5% BSA** | **2128** | **CST** |
| USP8 | **Rabbit** | **1:1000** | **5% BSA** | **8728** | **CST** |
| USP9x# | **Rabbit** | **1:1000** | **5% Milk** | **14898** | **CST** |
| USP10 | **Rabbit** | **1:1000** | **5% Milk** | **5553** | **CST** |
| USP14 | **Rabbit** | **1:1000** | **5% BSA** | **11931** | **CST** |
| USP28 | **Rabbit** | **1:1000** | **5% BSA** | **4217** | **CST** |
| Rabbit IgG control† | Rabbit | - | IP lysis buffer | ab37415 | Abcam |
| Anti-rabbit goat IgG, HRP-linked | Rabbit | 1:1000 | 5% Milk | 7074 | CST |
| Anti-mouse horse IgG, HRP-linked | Mouse | 1:1000 | 5% Milk | 7076 | CST |
| IRDye®680RD Goat-anti Rabbit IgG | Rabbit | 1:15000 | TBST | 926-68071 | Li-Cor |
| IRDye®800CW Goat-anti Mouse IgG | Rabbit | 1:15000 | TBST | 827-08364 | Li-Cor |

**Supplemental Table 3: Western blot and co-immunoprecipitation (co-IP) antibodies information.**

*Protein loading controls. #These antibodies were used for immunoblotting and co-IP. †This antibody was used in co-IP as a rabbit IgG control.

| **Target** | **Clone ID** | **Target sequence** | **Vector ID** | **KD levels in MEC1** | **Region** |
| --- | --- | --- | --- | --- | --- |
| USP7 | TRCN0000004057 | CCAGCTAAGTATCAAAGGAAA | TRC1 | RNA: 25%  Protein: 88% | CDS |
| USP7 | TRCN0000010845 | CGTGGTGTCAAGGTGTACTAA | TRC1 | RNA: 53%  Protein: 62% | CDS |
| USP7 | TRCN0000318521 | CCTGGATTTGTGGTTACGTTA | TRC2 | RNA: 63%  Protein: 55% | CDS |
| USP7 | TRCN0000318578 | CCAGCTAAGTATCAAAGGAAA | TRC2 | RNA: 41%  Protein: 58% | CDS |

**Supplemental Table 4: shRNA constructs.**

All shRNA constructs were purchased from Sigma. Knock-down (KD) levels indicate the amount of USP7 RNA/protein expression remaining.

| Gene | Species | Chromosome Location | Assay ID |
| --- | --- | --- | --- |
| B2M | Human | Chr.15: 44711487 - 44718159 | Hs00984230_m1 |
| BBC3 | Human | Chr.19: 47220822 - 47232998 | Hs00248075_m1 |
| BCL2L1 | Human | Chr.20: 31664452 - 31723999 | Hs00236329_m1 |
| BCL2L11 | Human | Chr.2: 111120914 - 111168445 | Hs00153408_m1 |
| CCND2 | Human | Chr.12: 4273736 - 4305356 | Hs00153380_m1 |
| FOXO1 | Human | Chr.13: 40555664 - 40666597 | Hs01054576_m1 |
| FOXO3 | Human | Chr.6: 108559823 - 108684769 | Hs00818121_m1 |
| FOXO4 | Human | Chr.X: 71096149 - 71103534 | Hs00936217_g1 |
| GADD45A | Human | Chr.1: 67685177 - 67688338 | Hs00169255_m1 |
| GAPDH | Human | Chr.12: 6534405 - 6538375 | Hs99999905_m1 |
| IGF1R | Human | Chr.15: 98648539 - 98964530 | Hs00609566_m1 |
| SESN3 | Human | Chr.11: 95165513 - 95232541 | Hs00914870_m1 |
| USP7 | Human | Chr.16: 8892094 - 8963912 | Hs00931763_m1 |

**Supplemental Table 5: TaqMan Probes for RT-qPCR.**

All primers/probes were purchased from ThermoFisher Scientific.


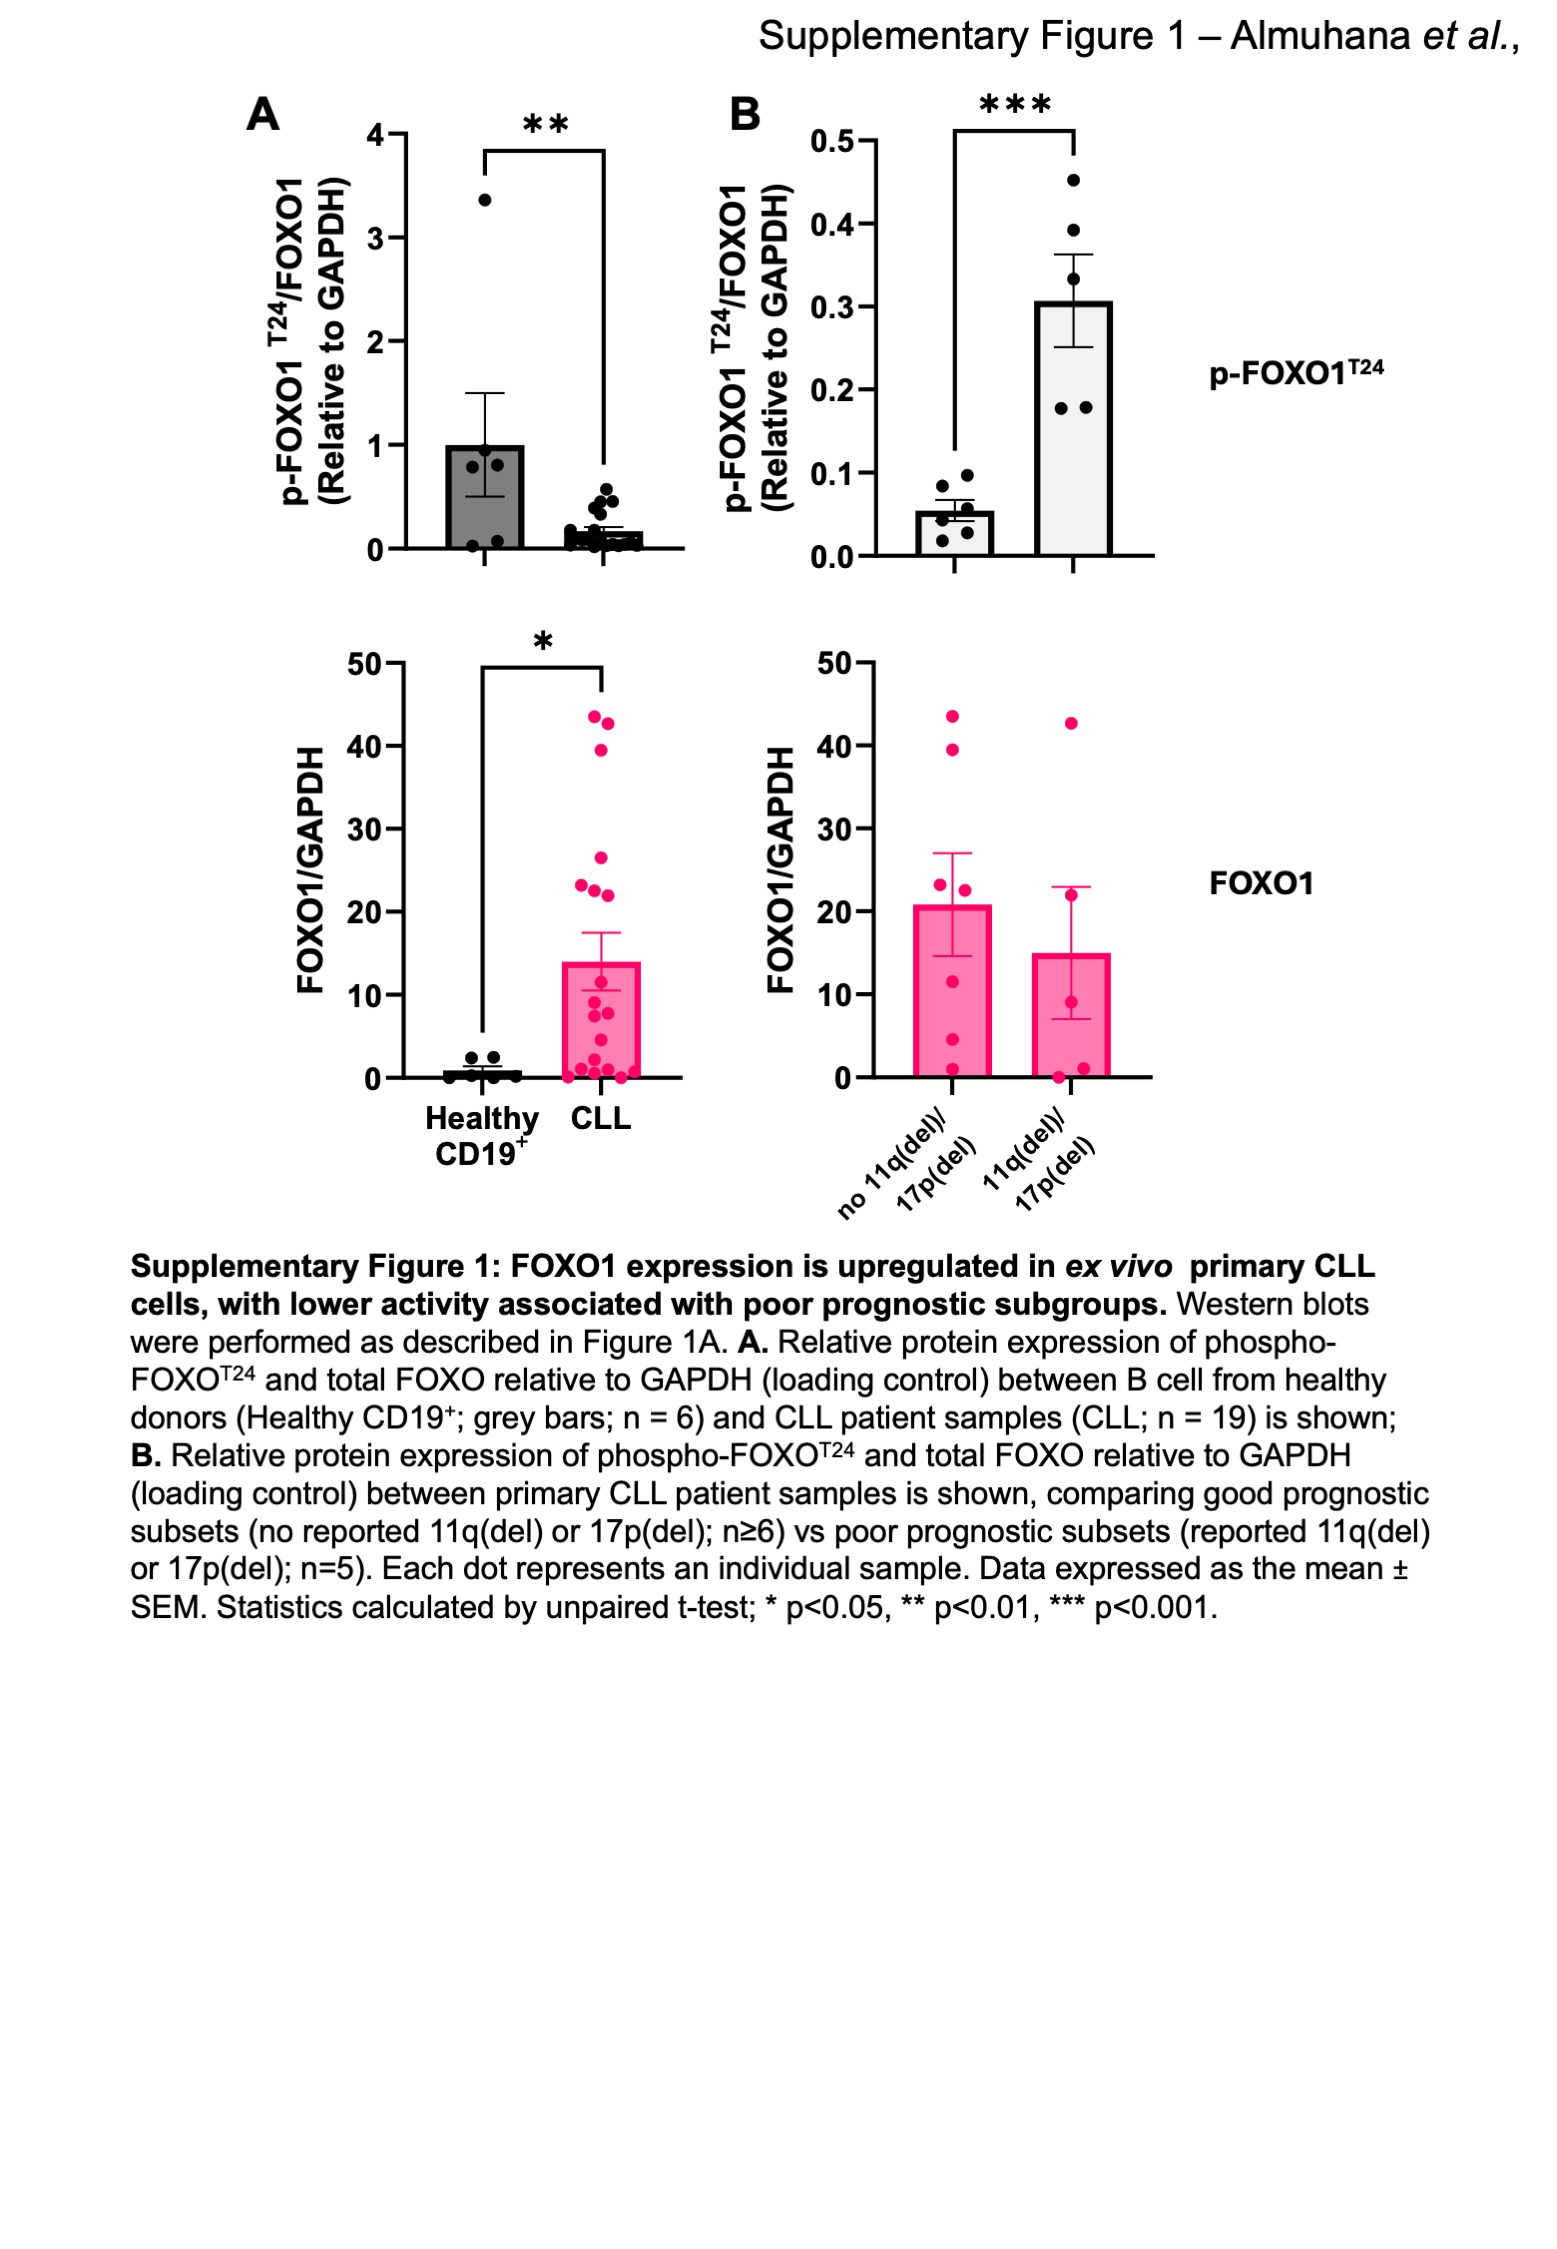


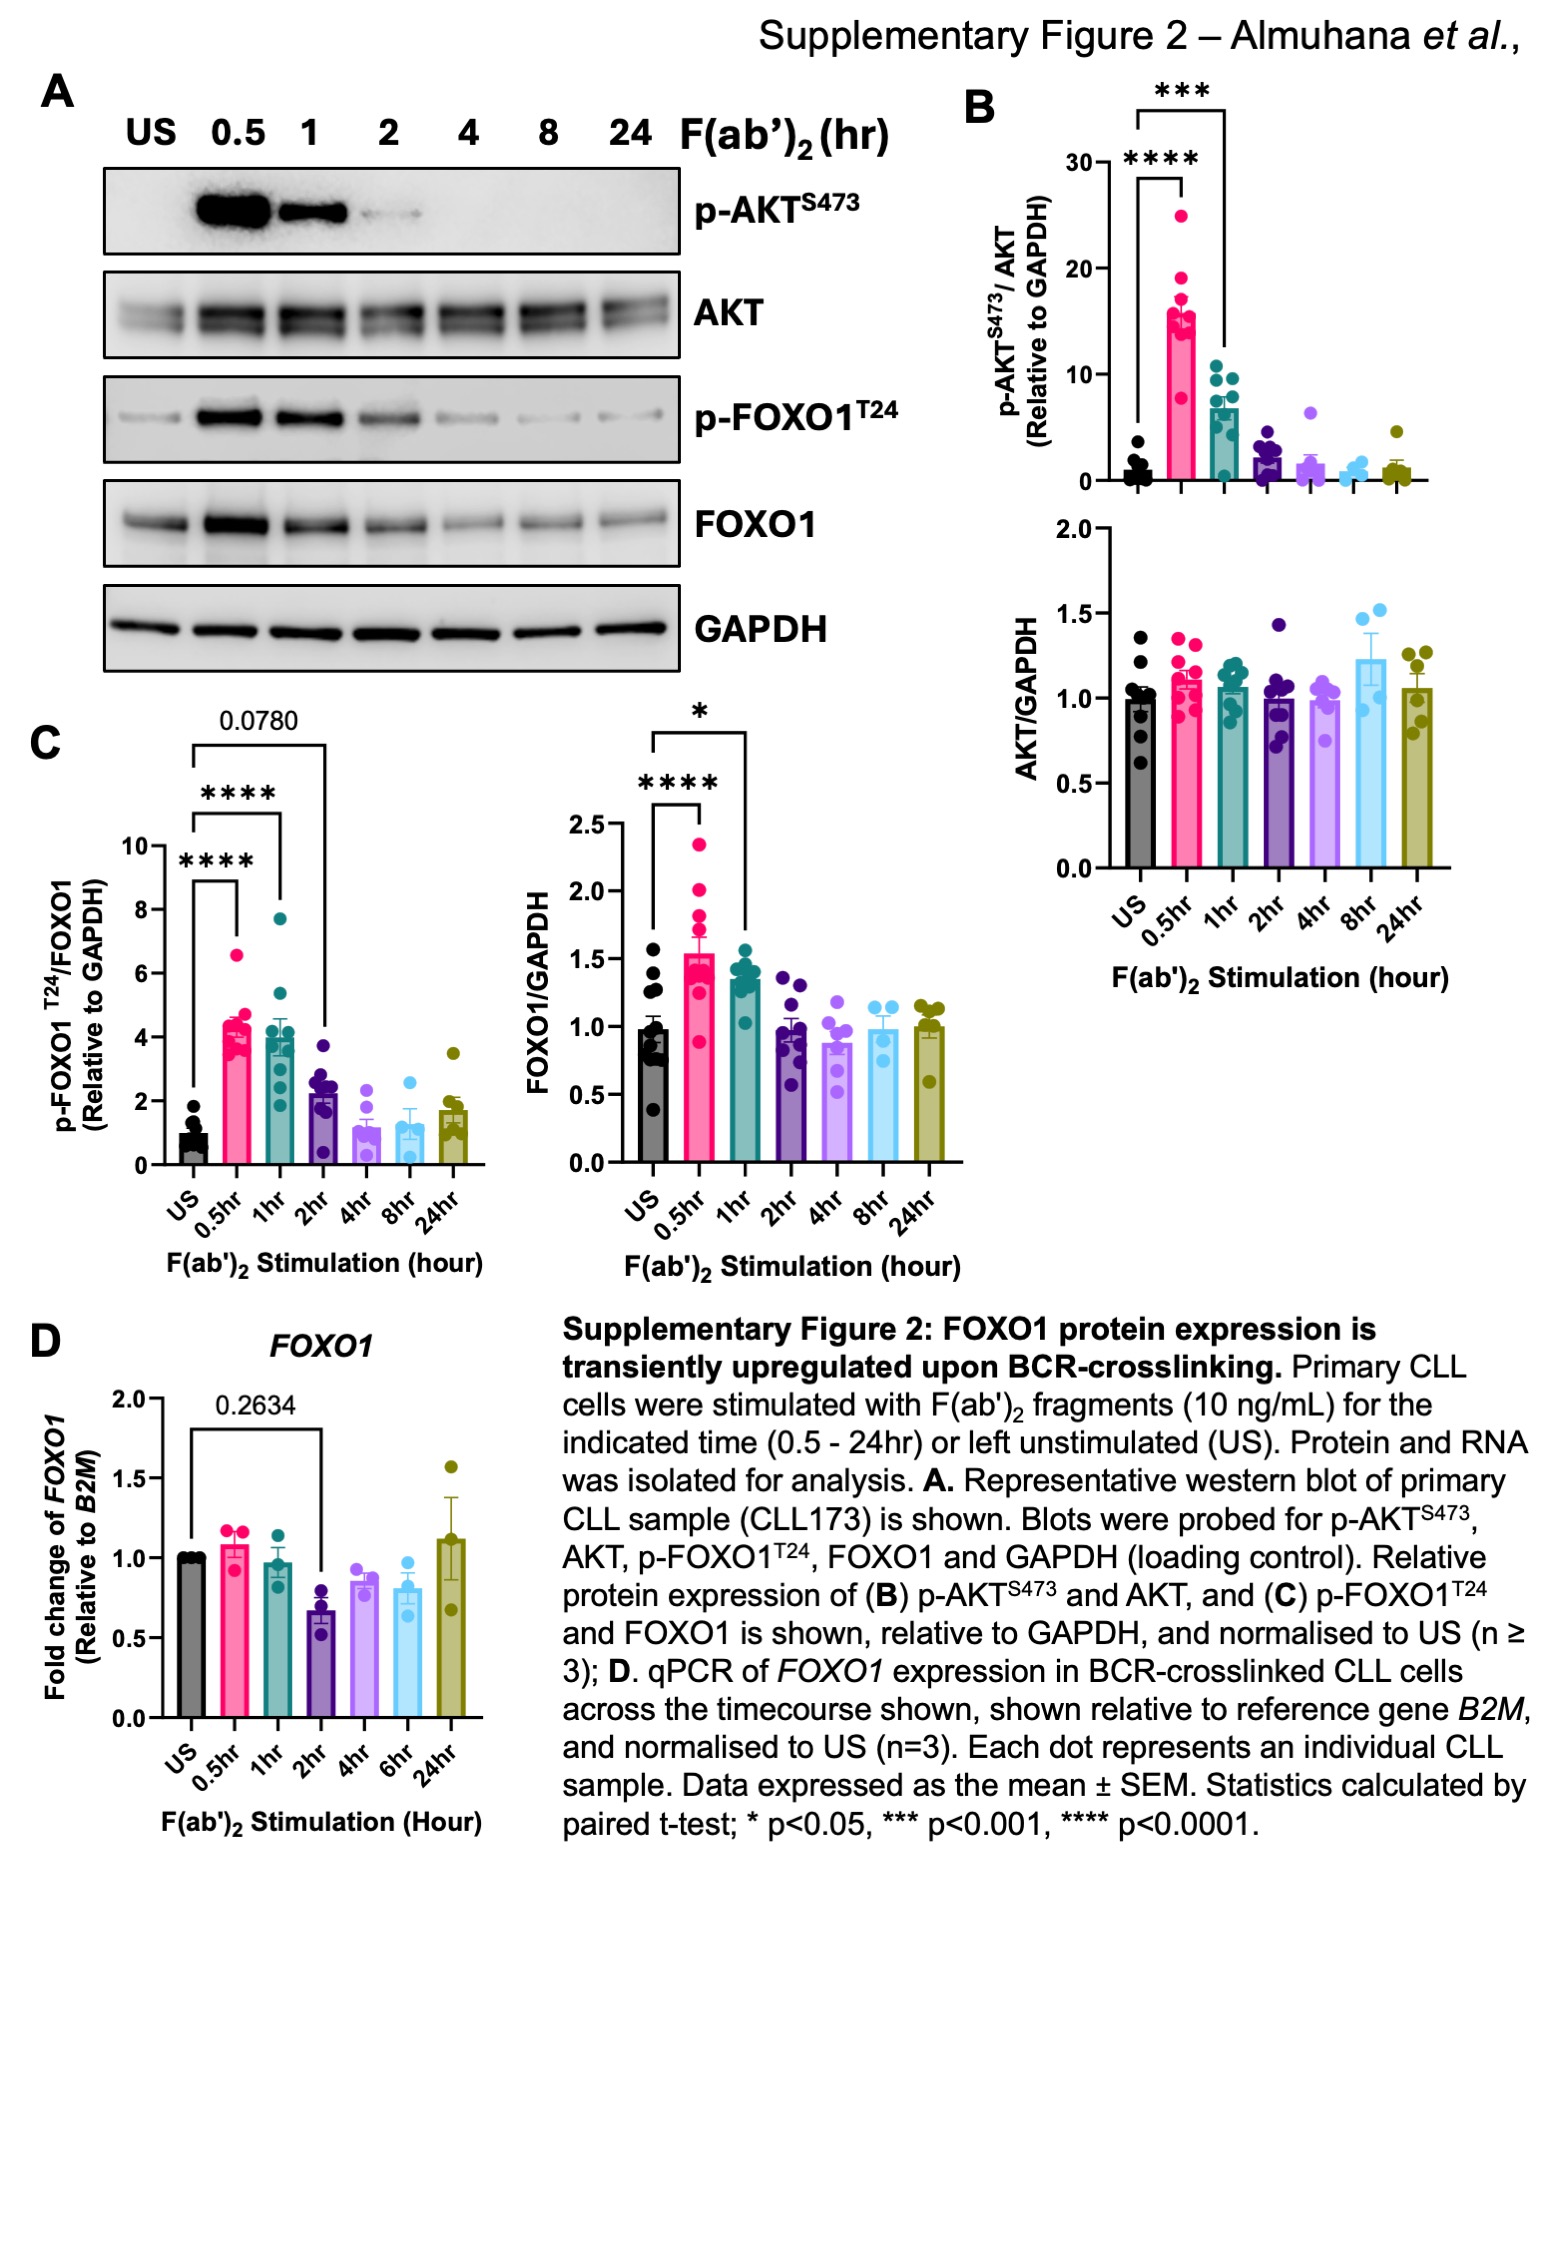


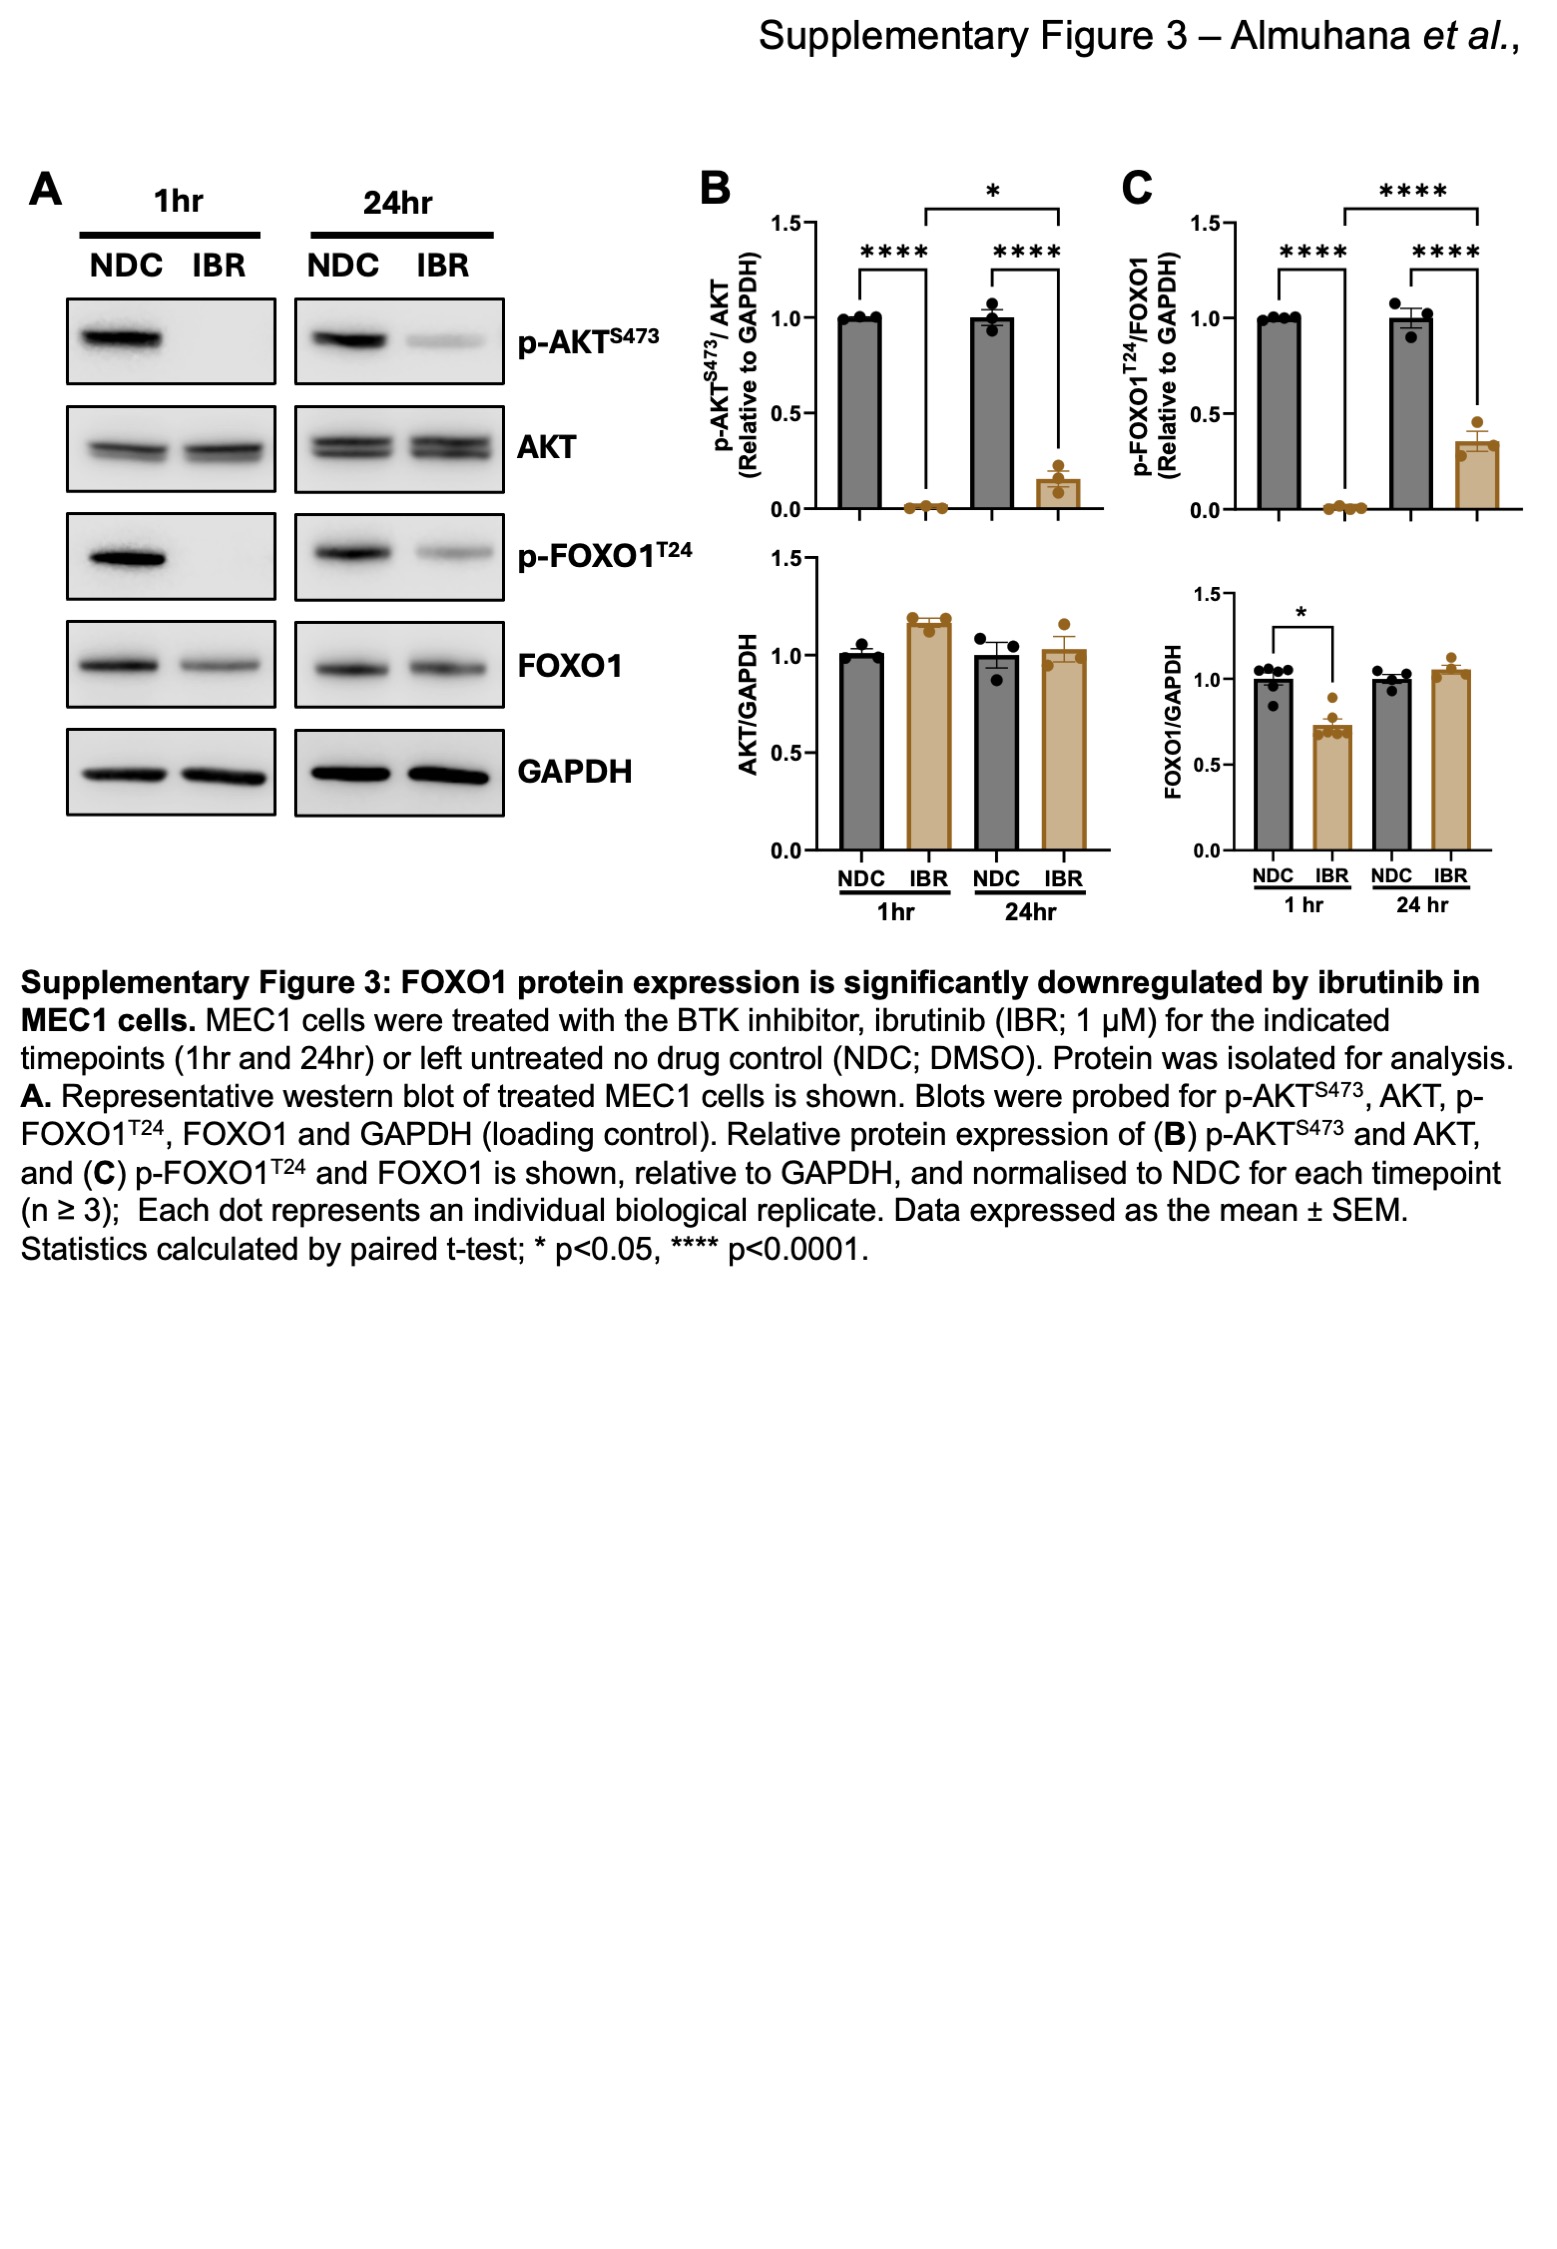


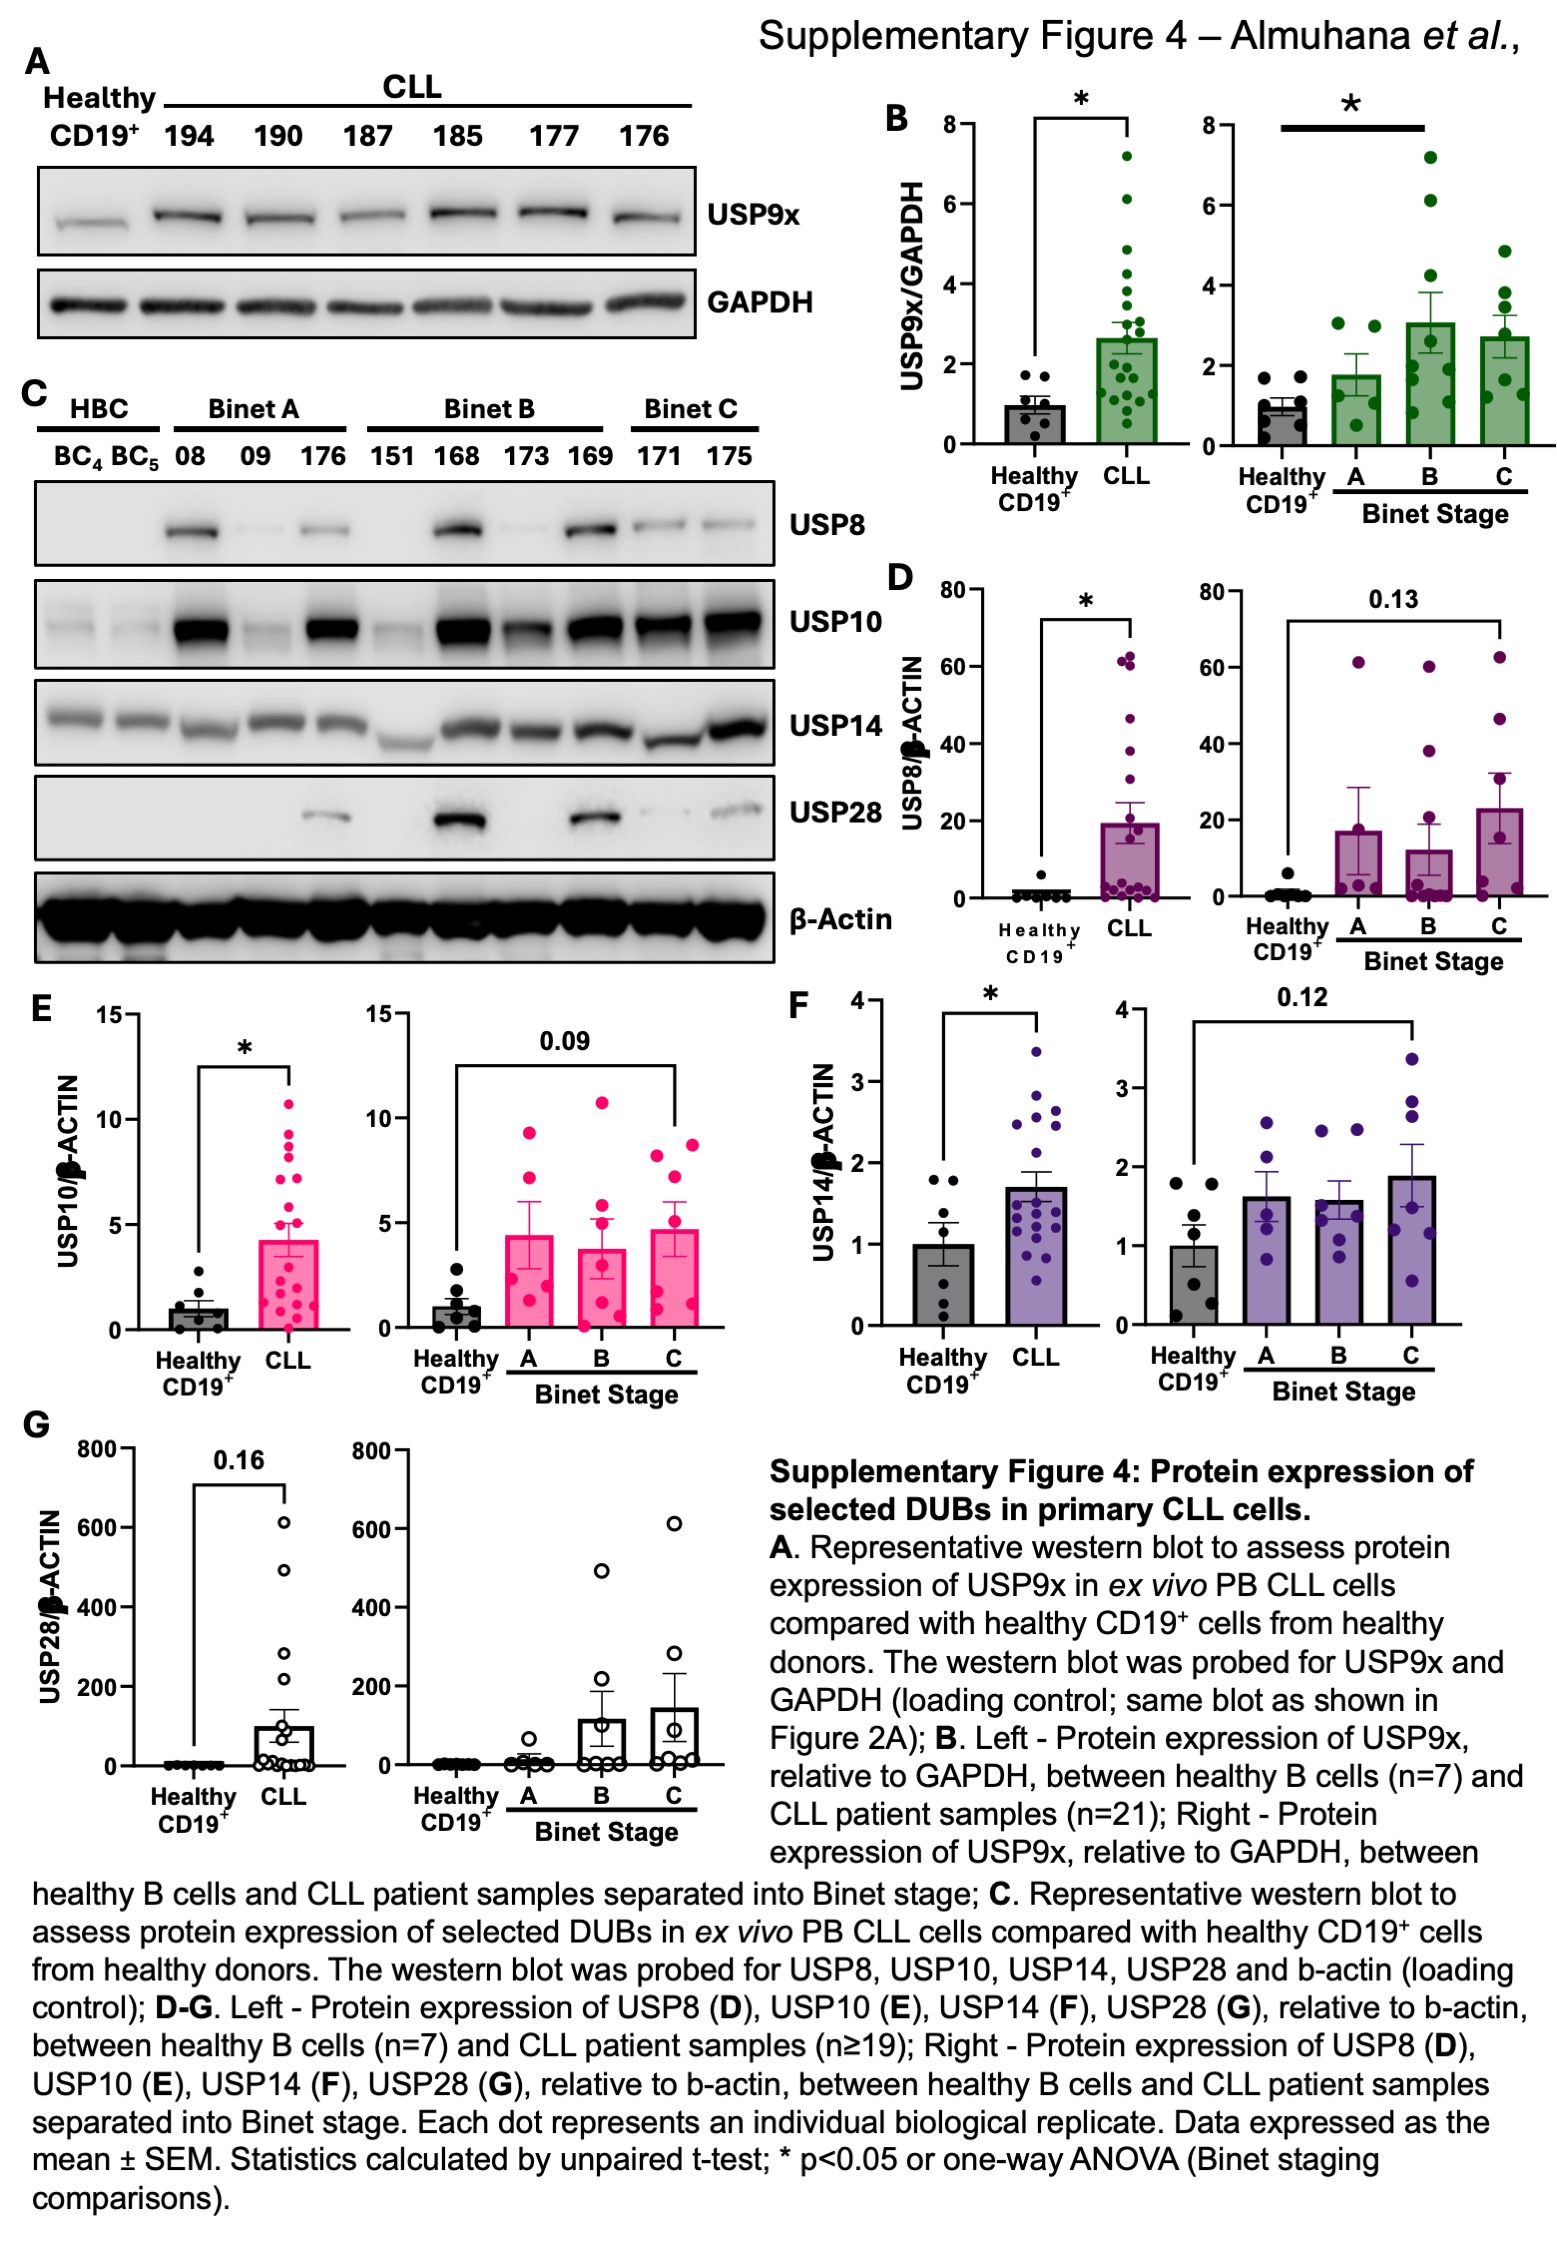


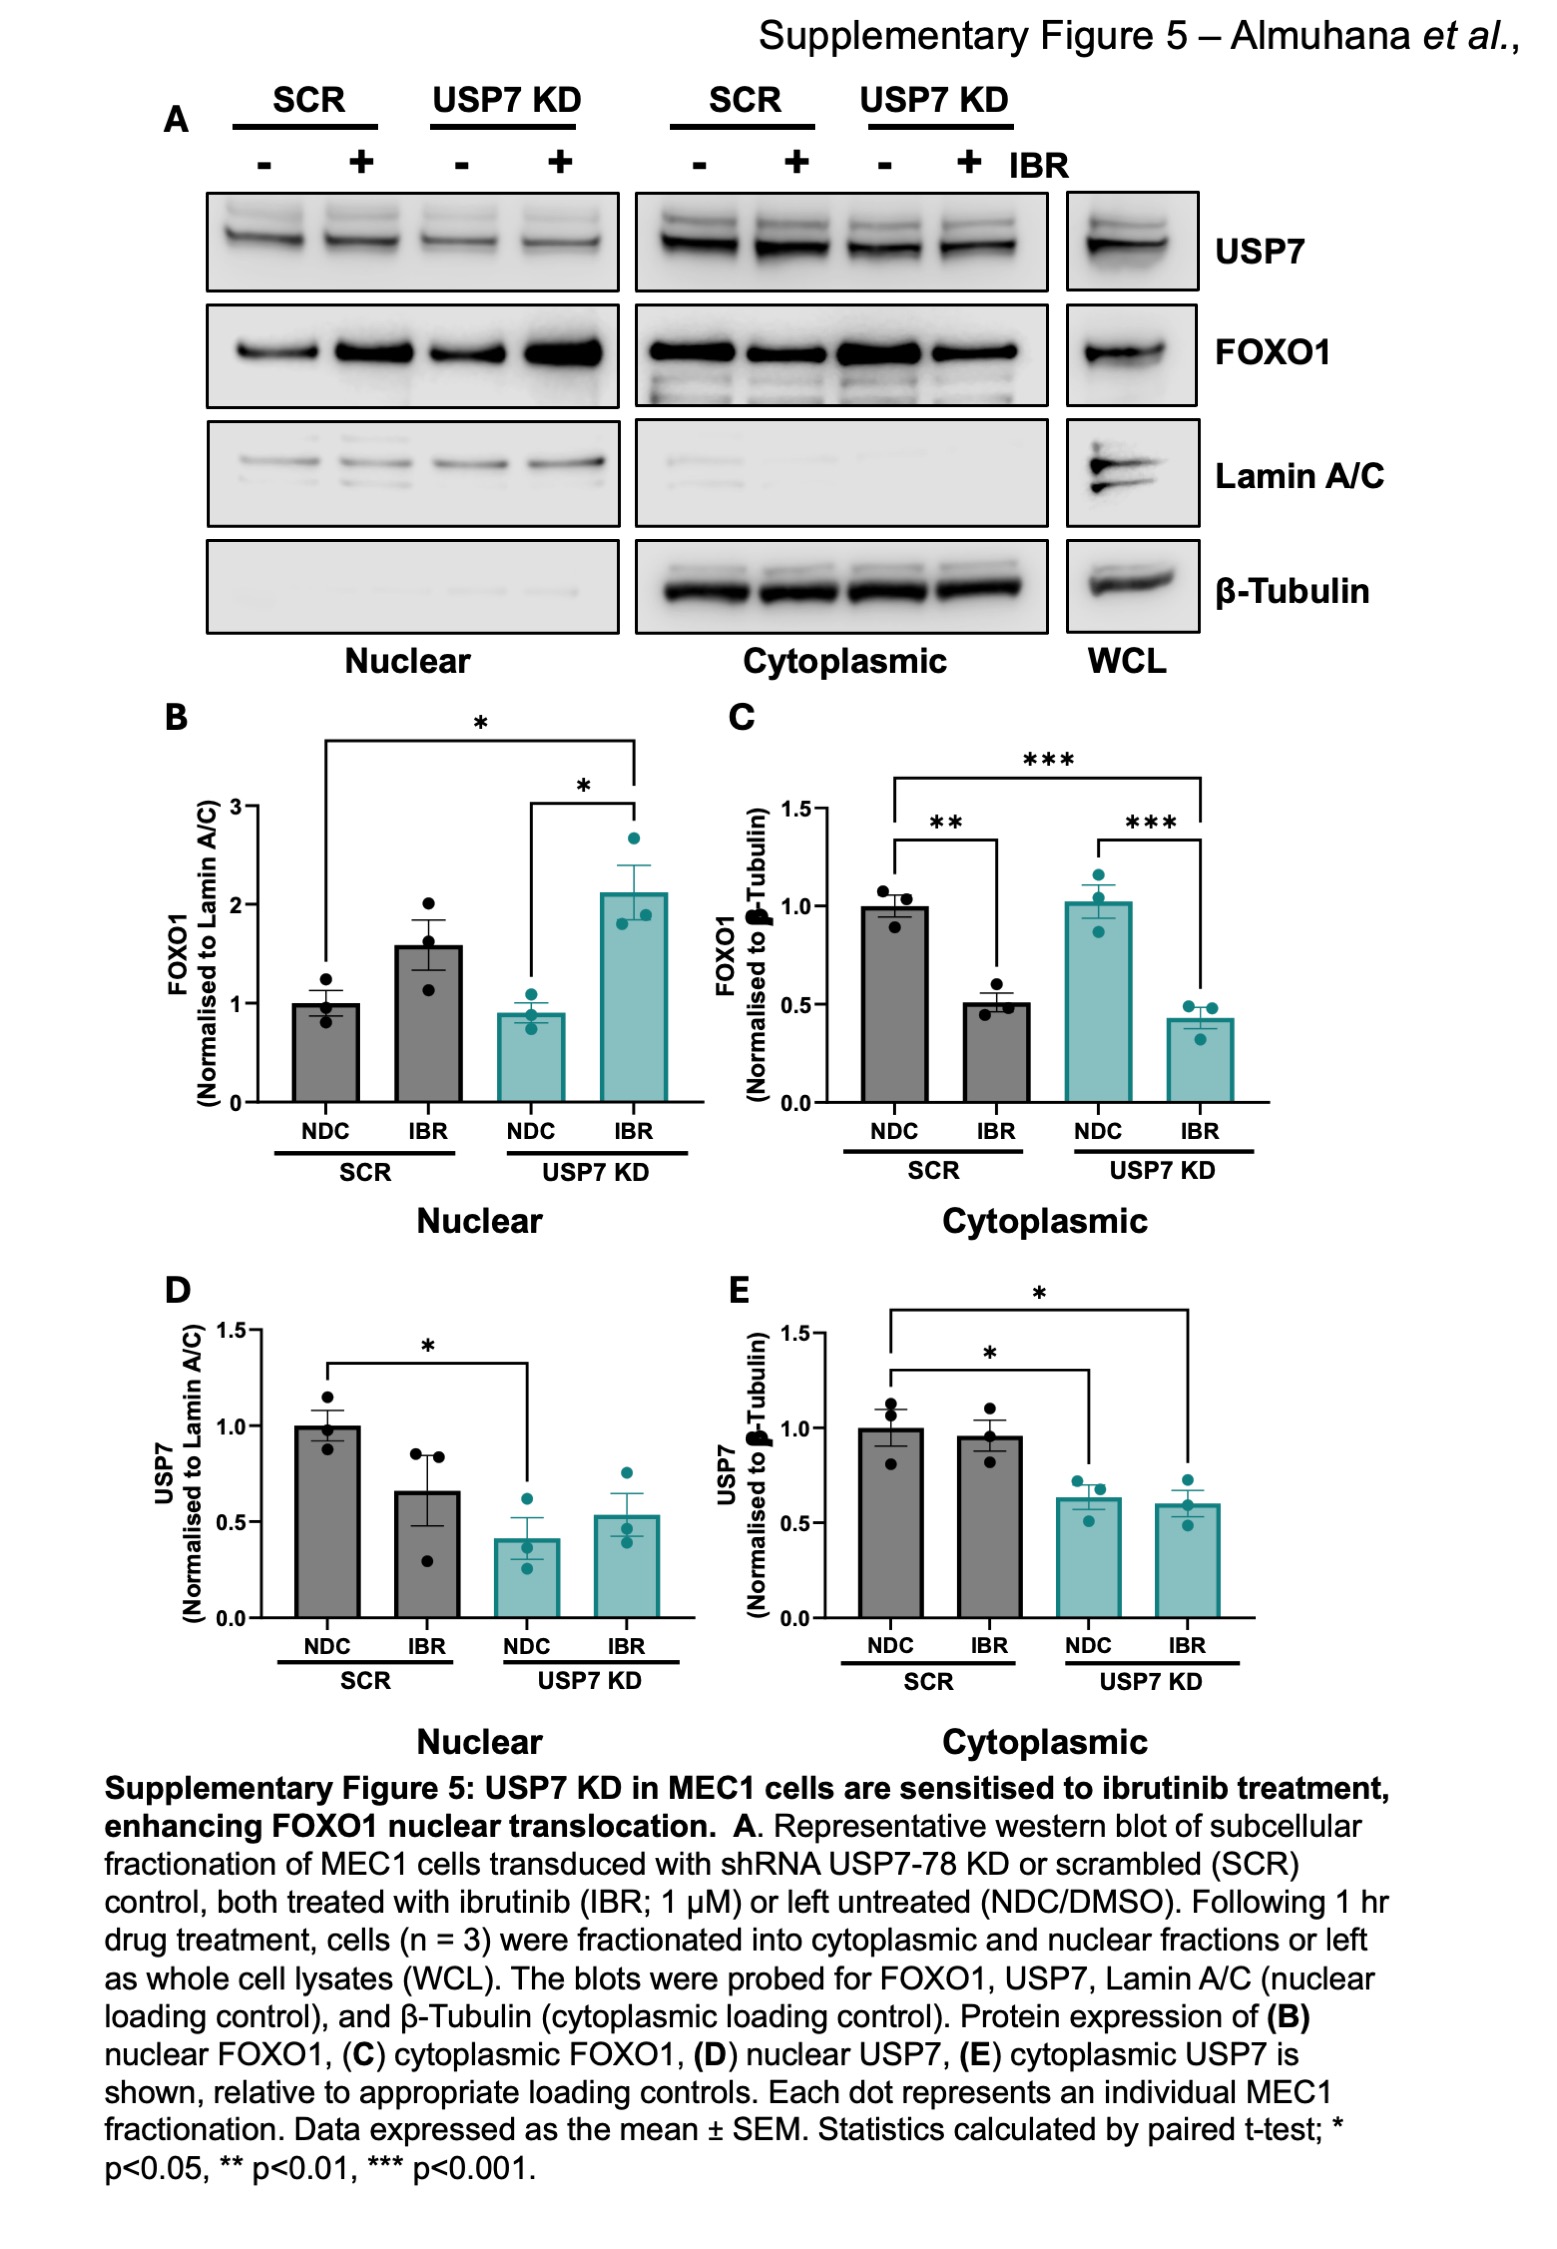


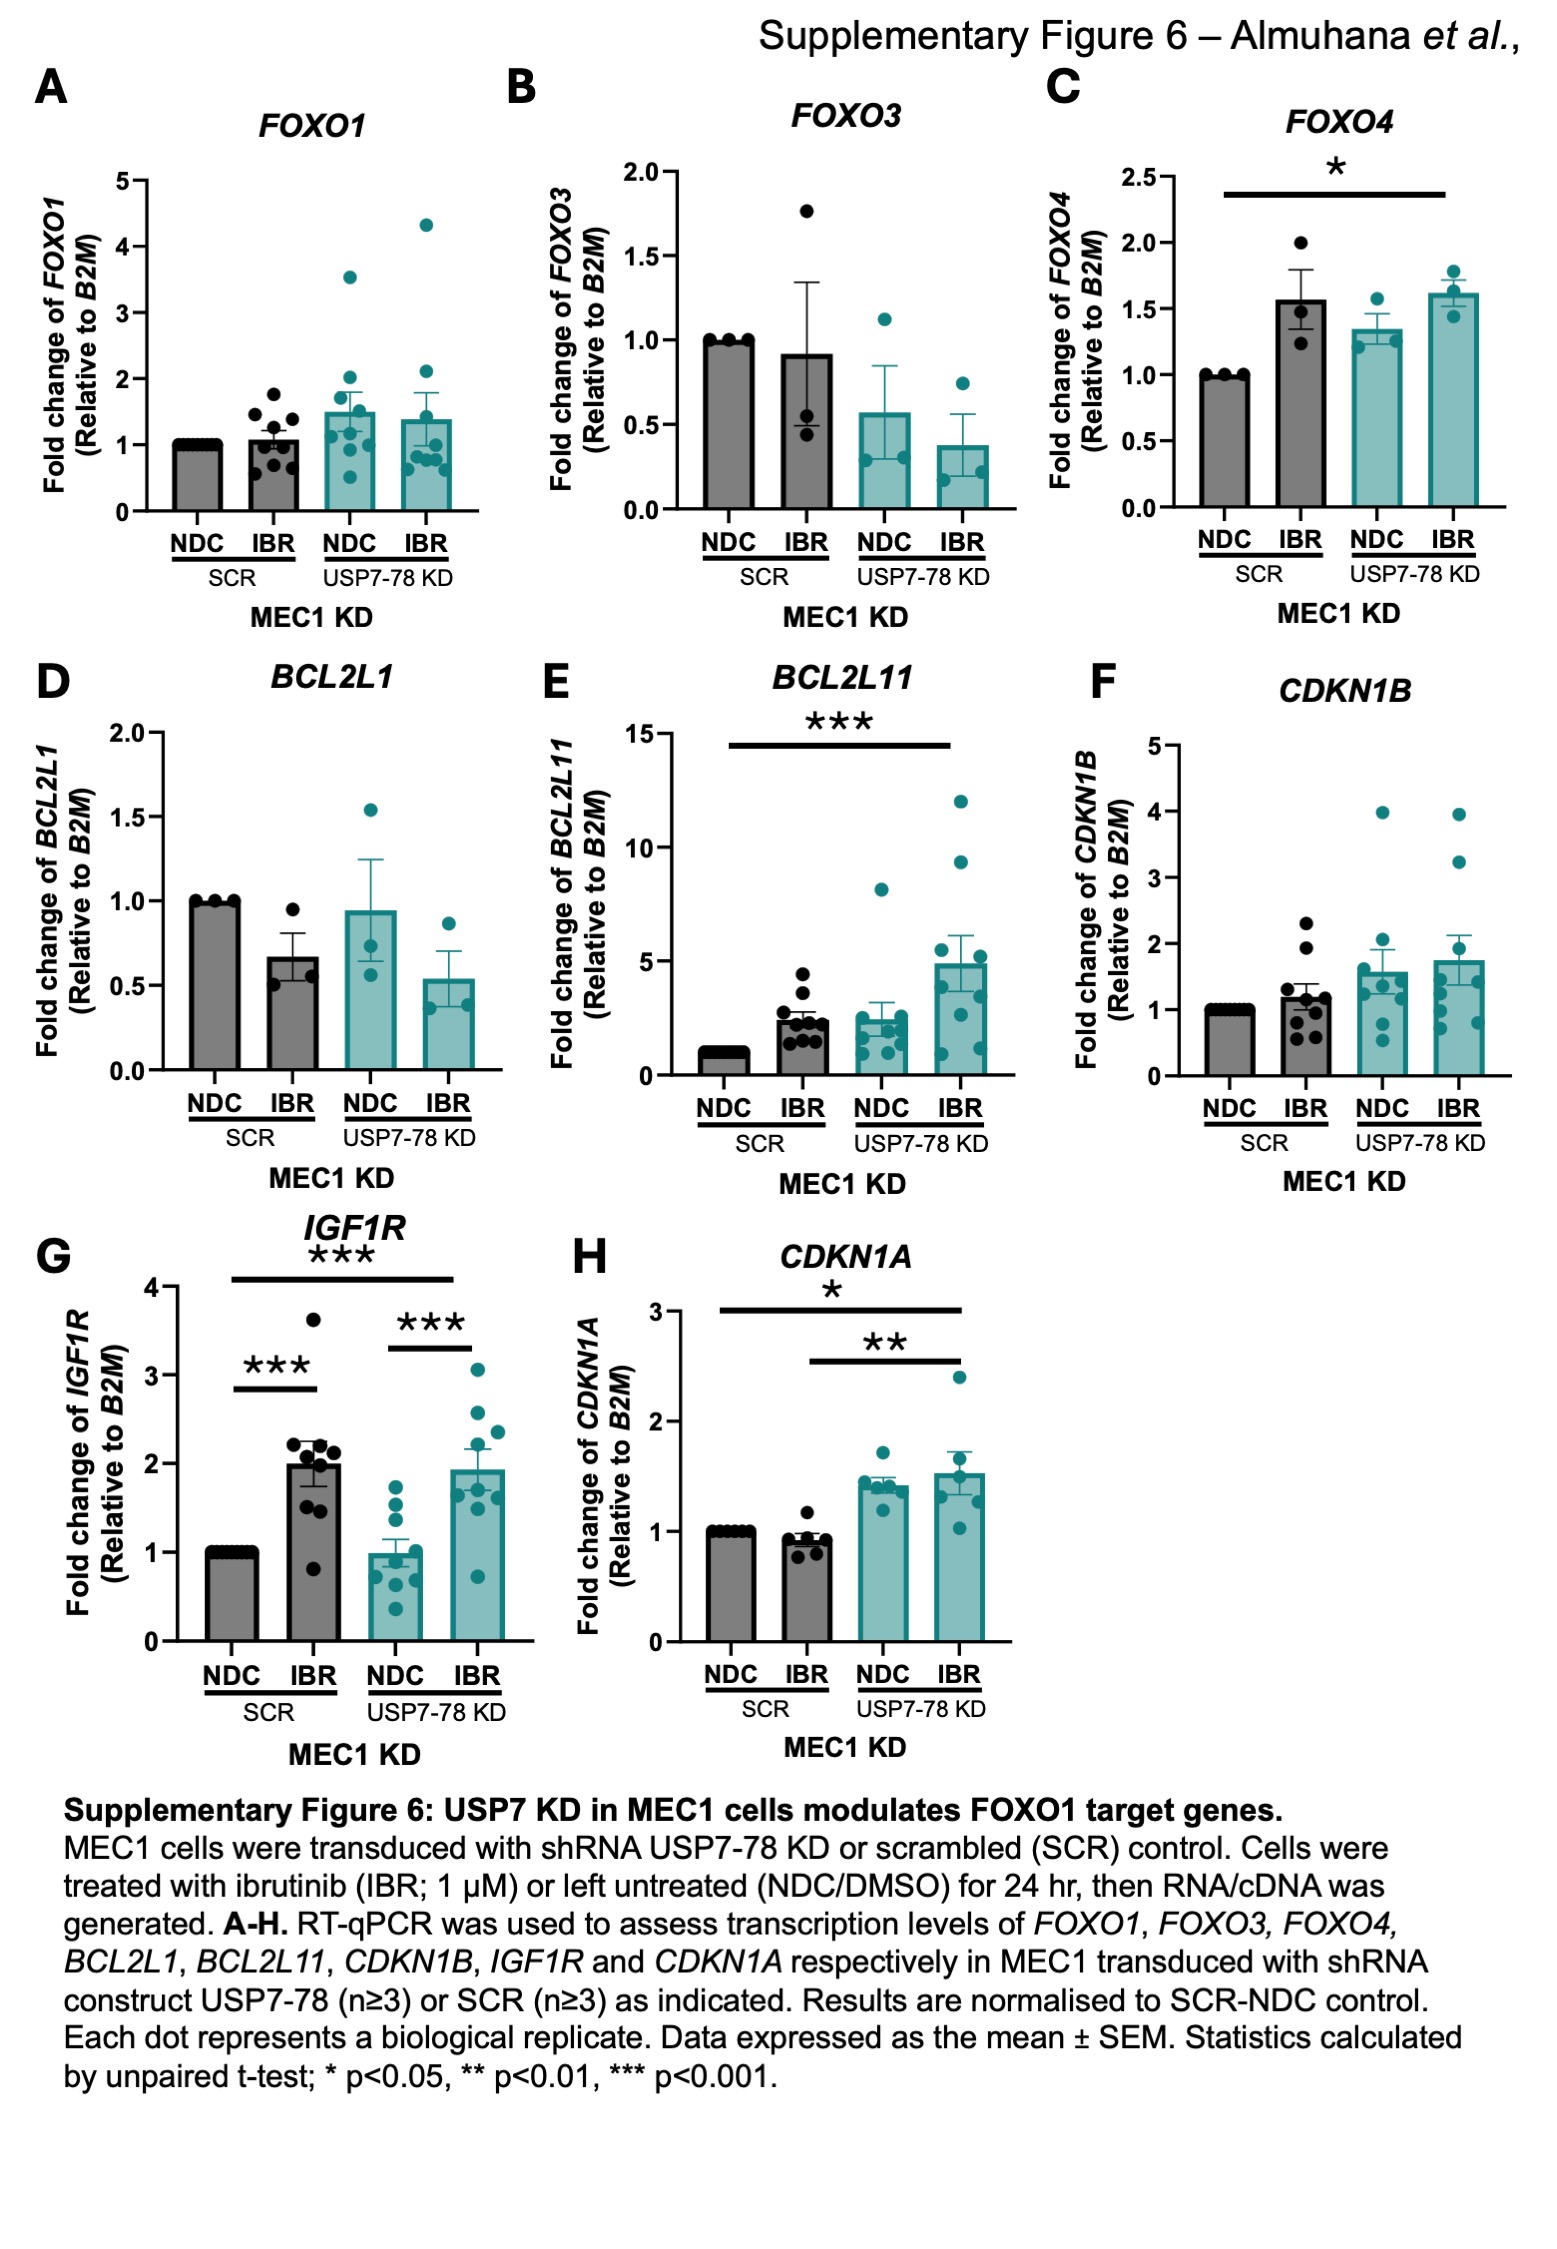


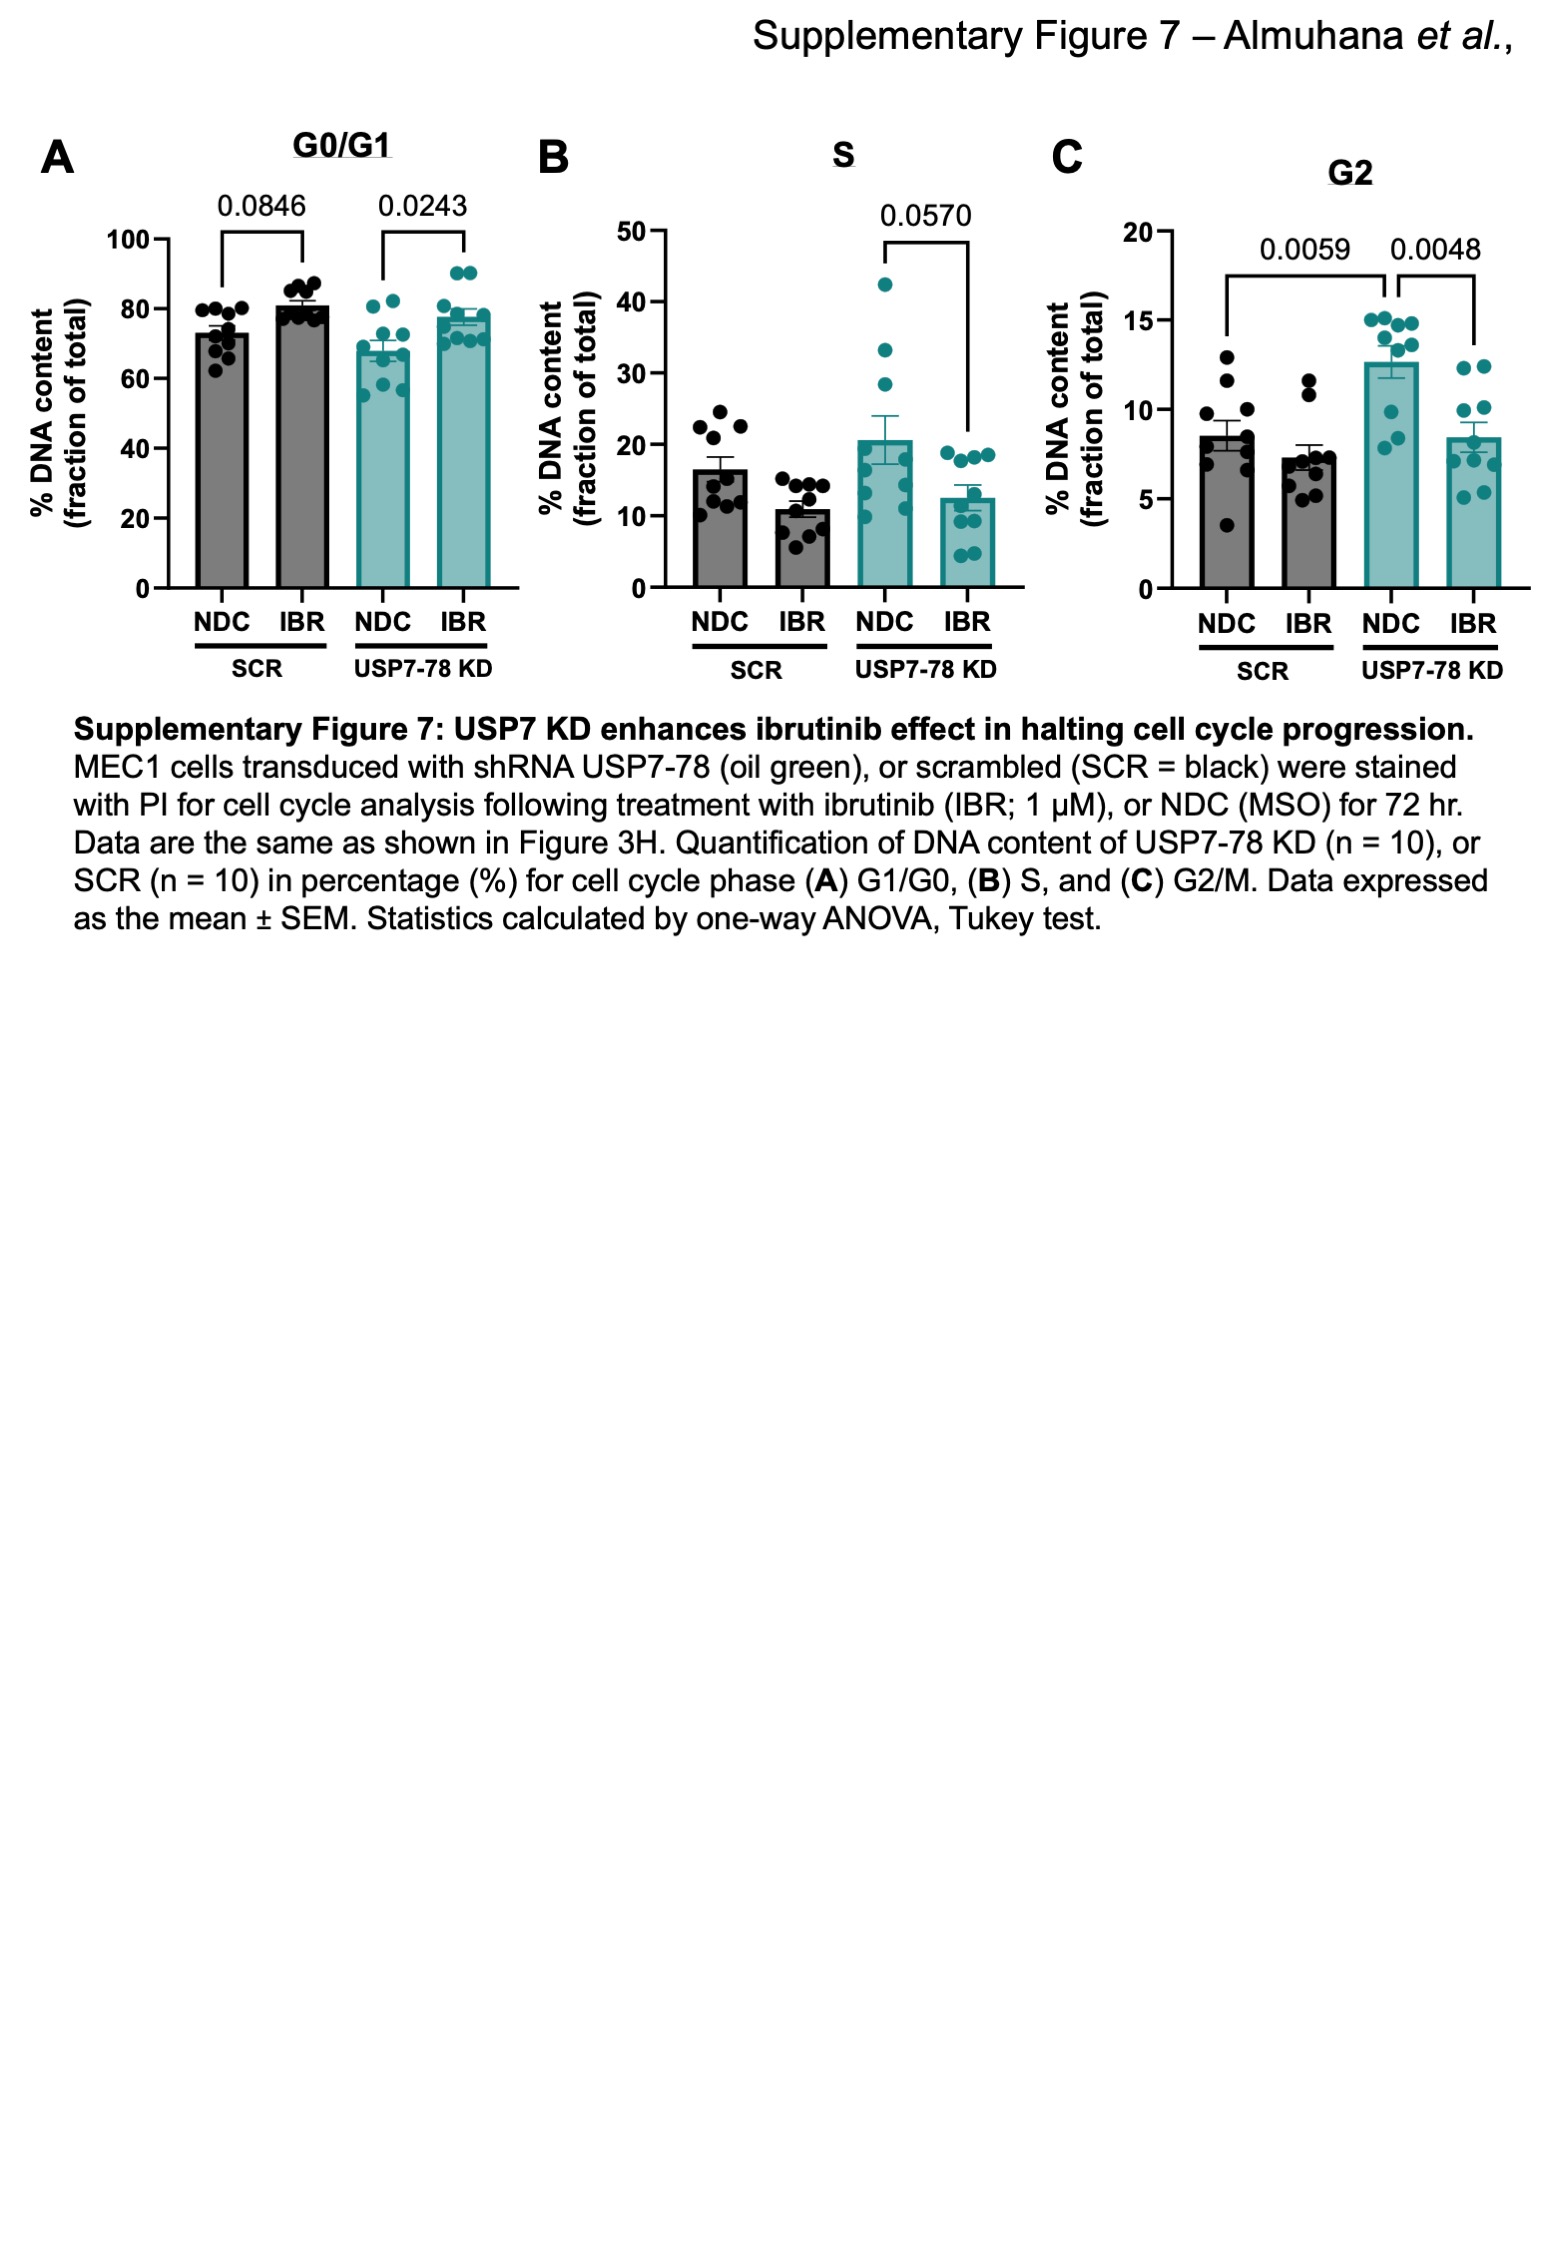


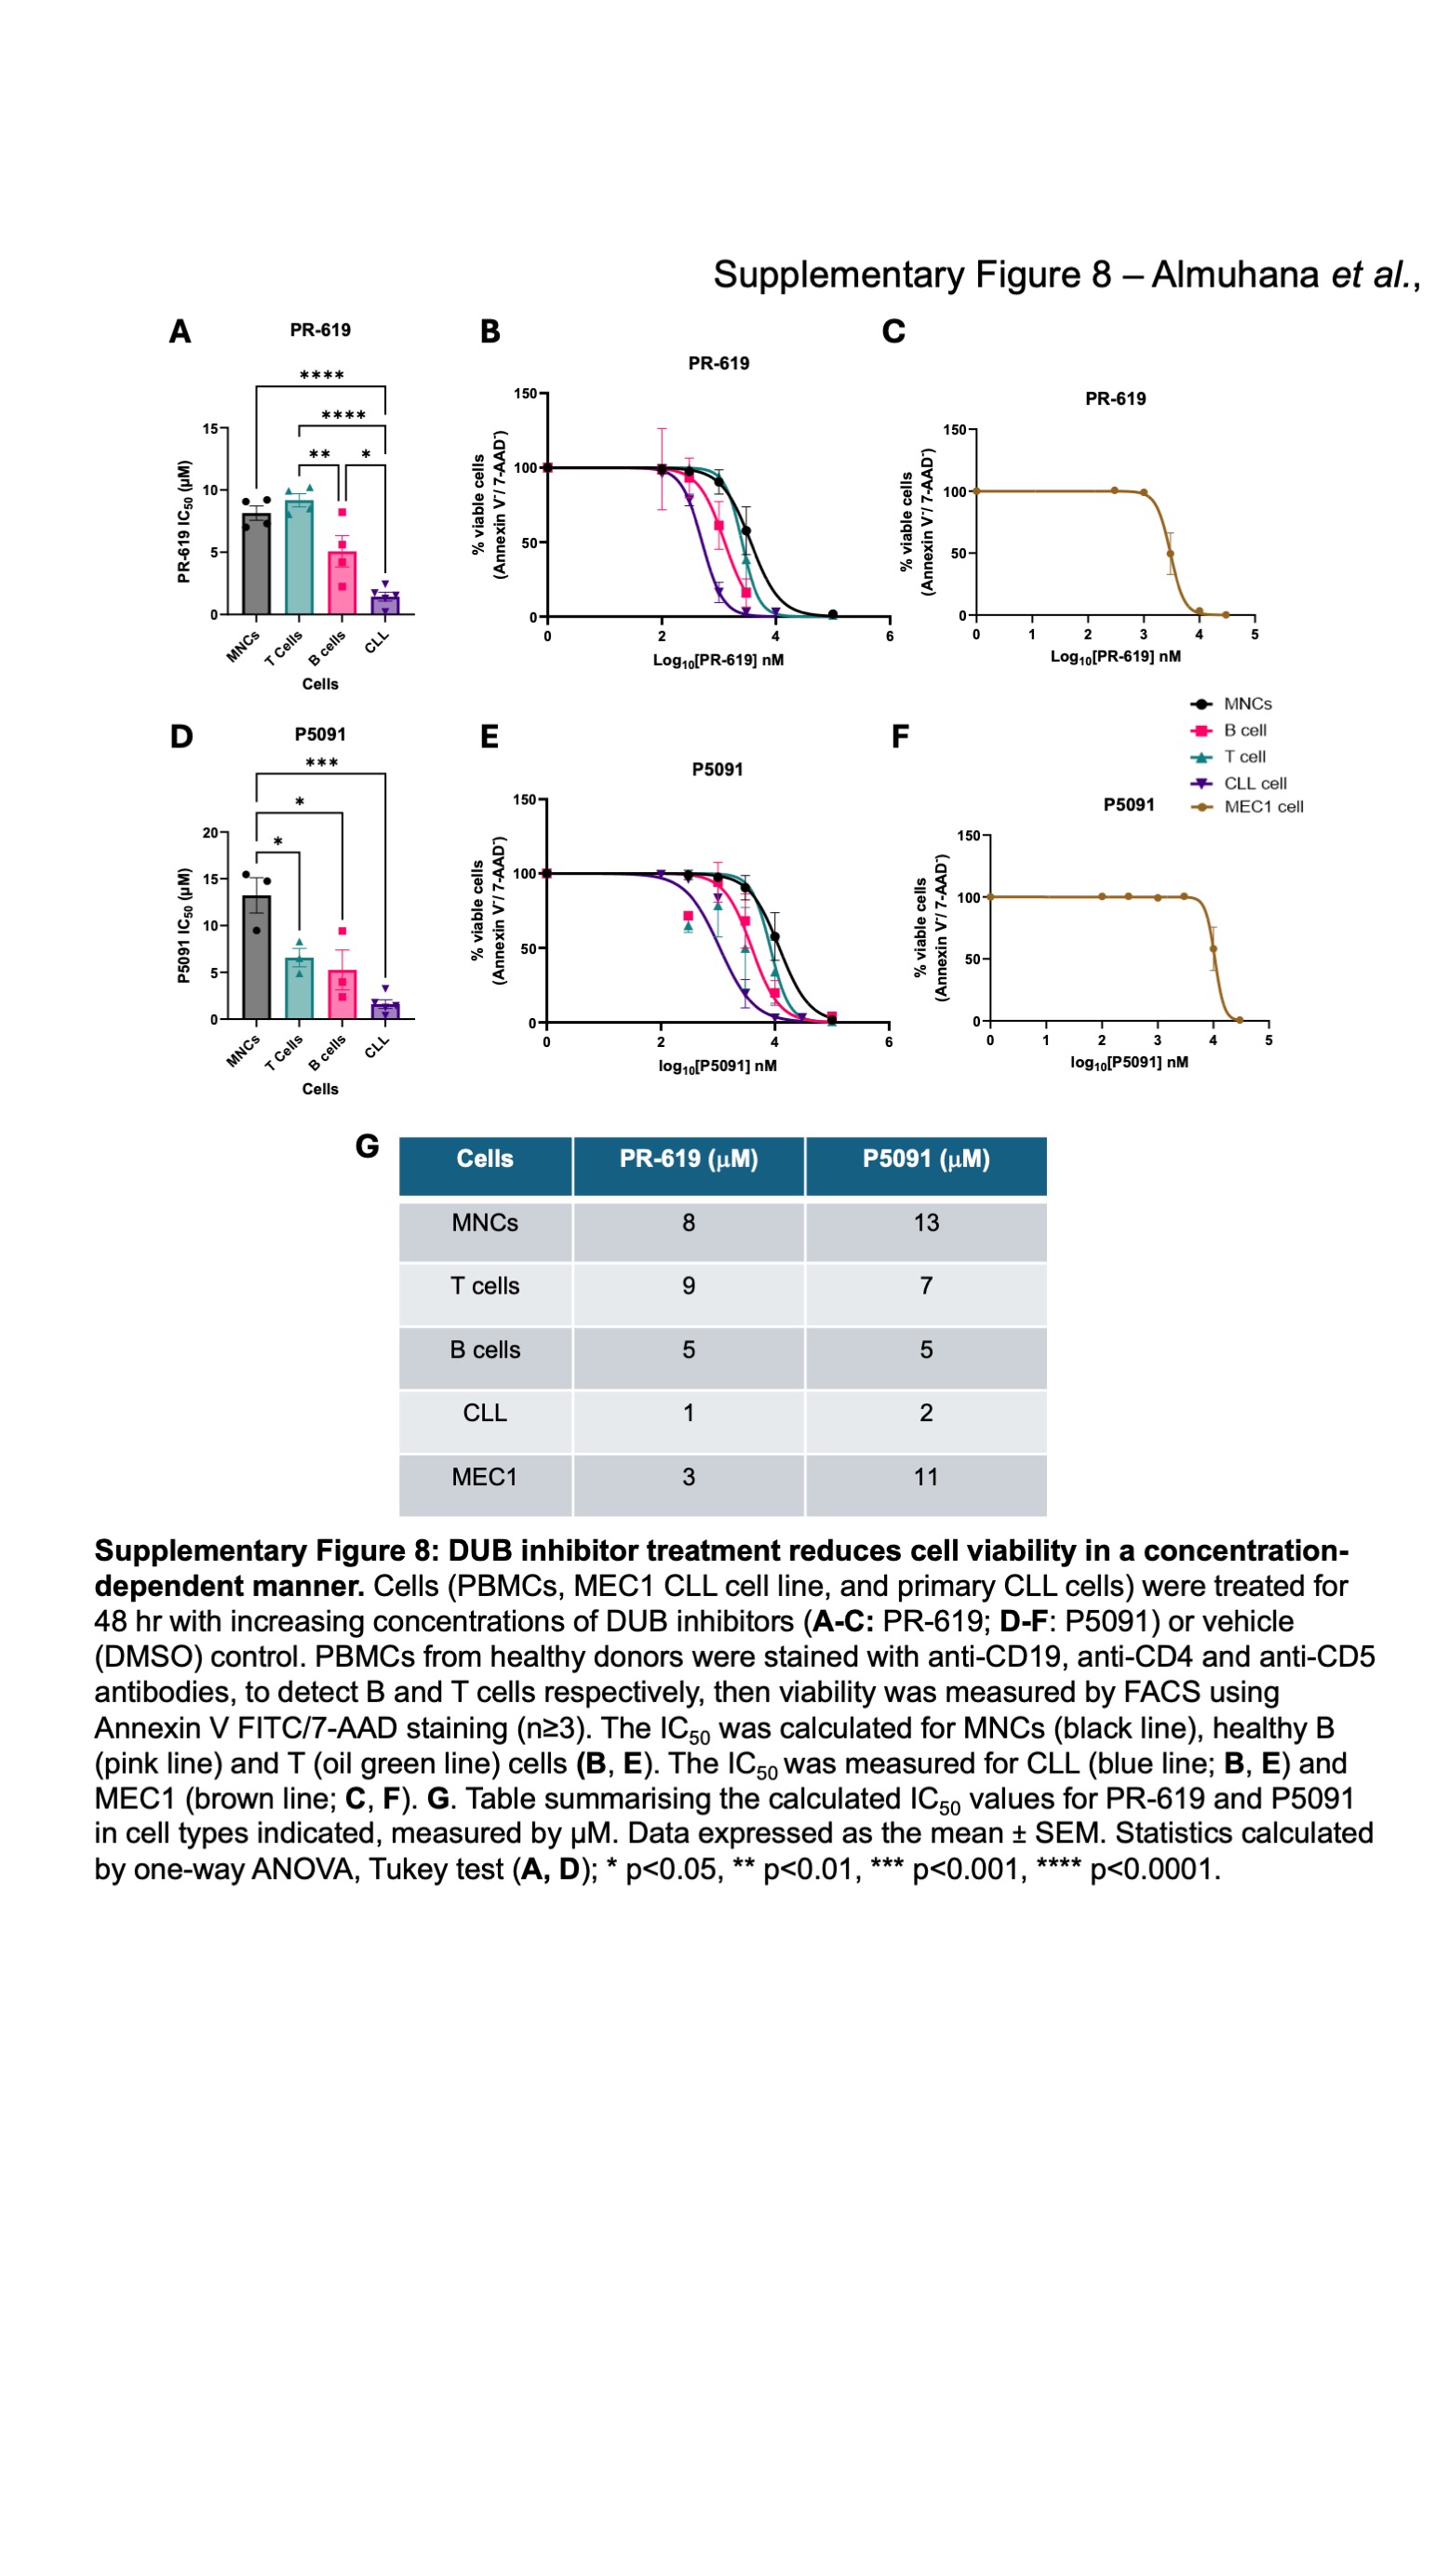


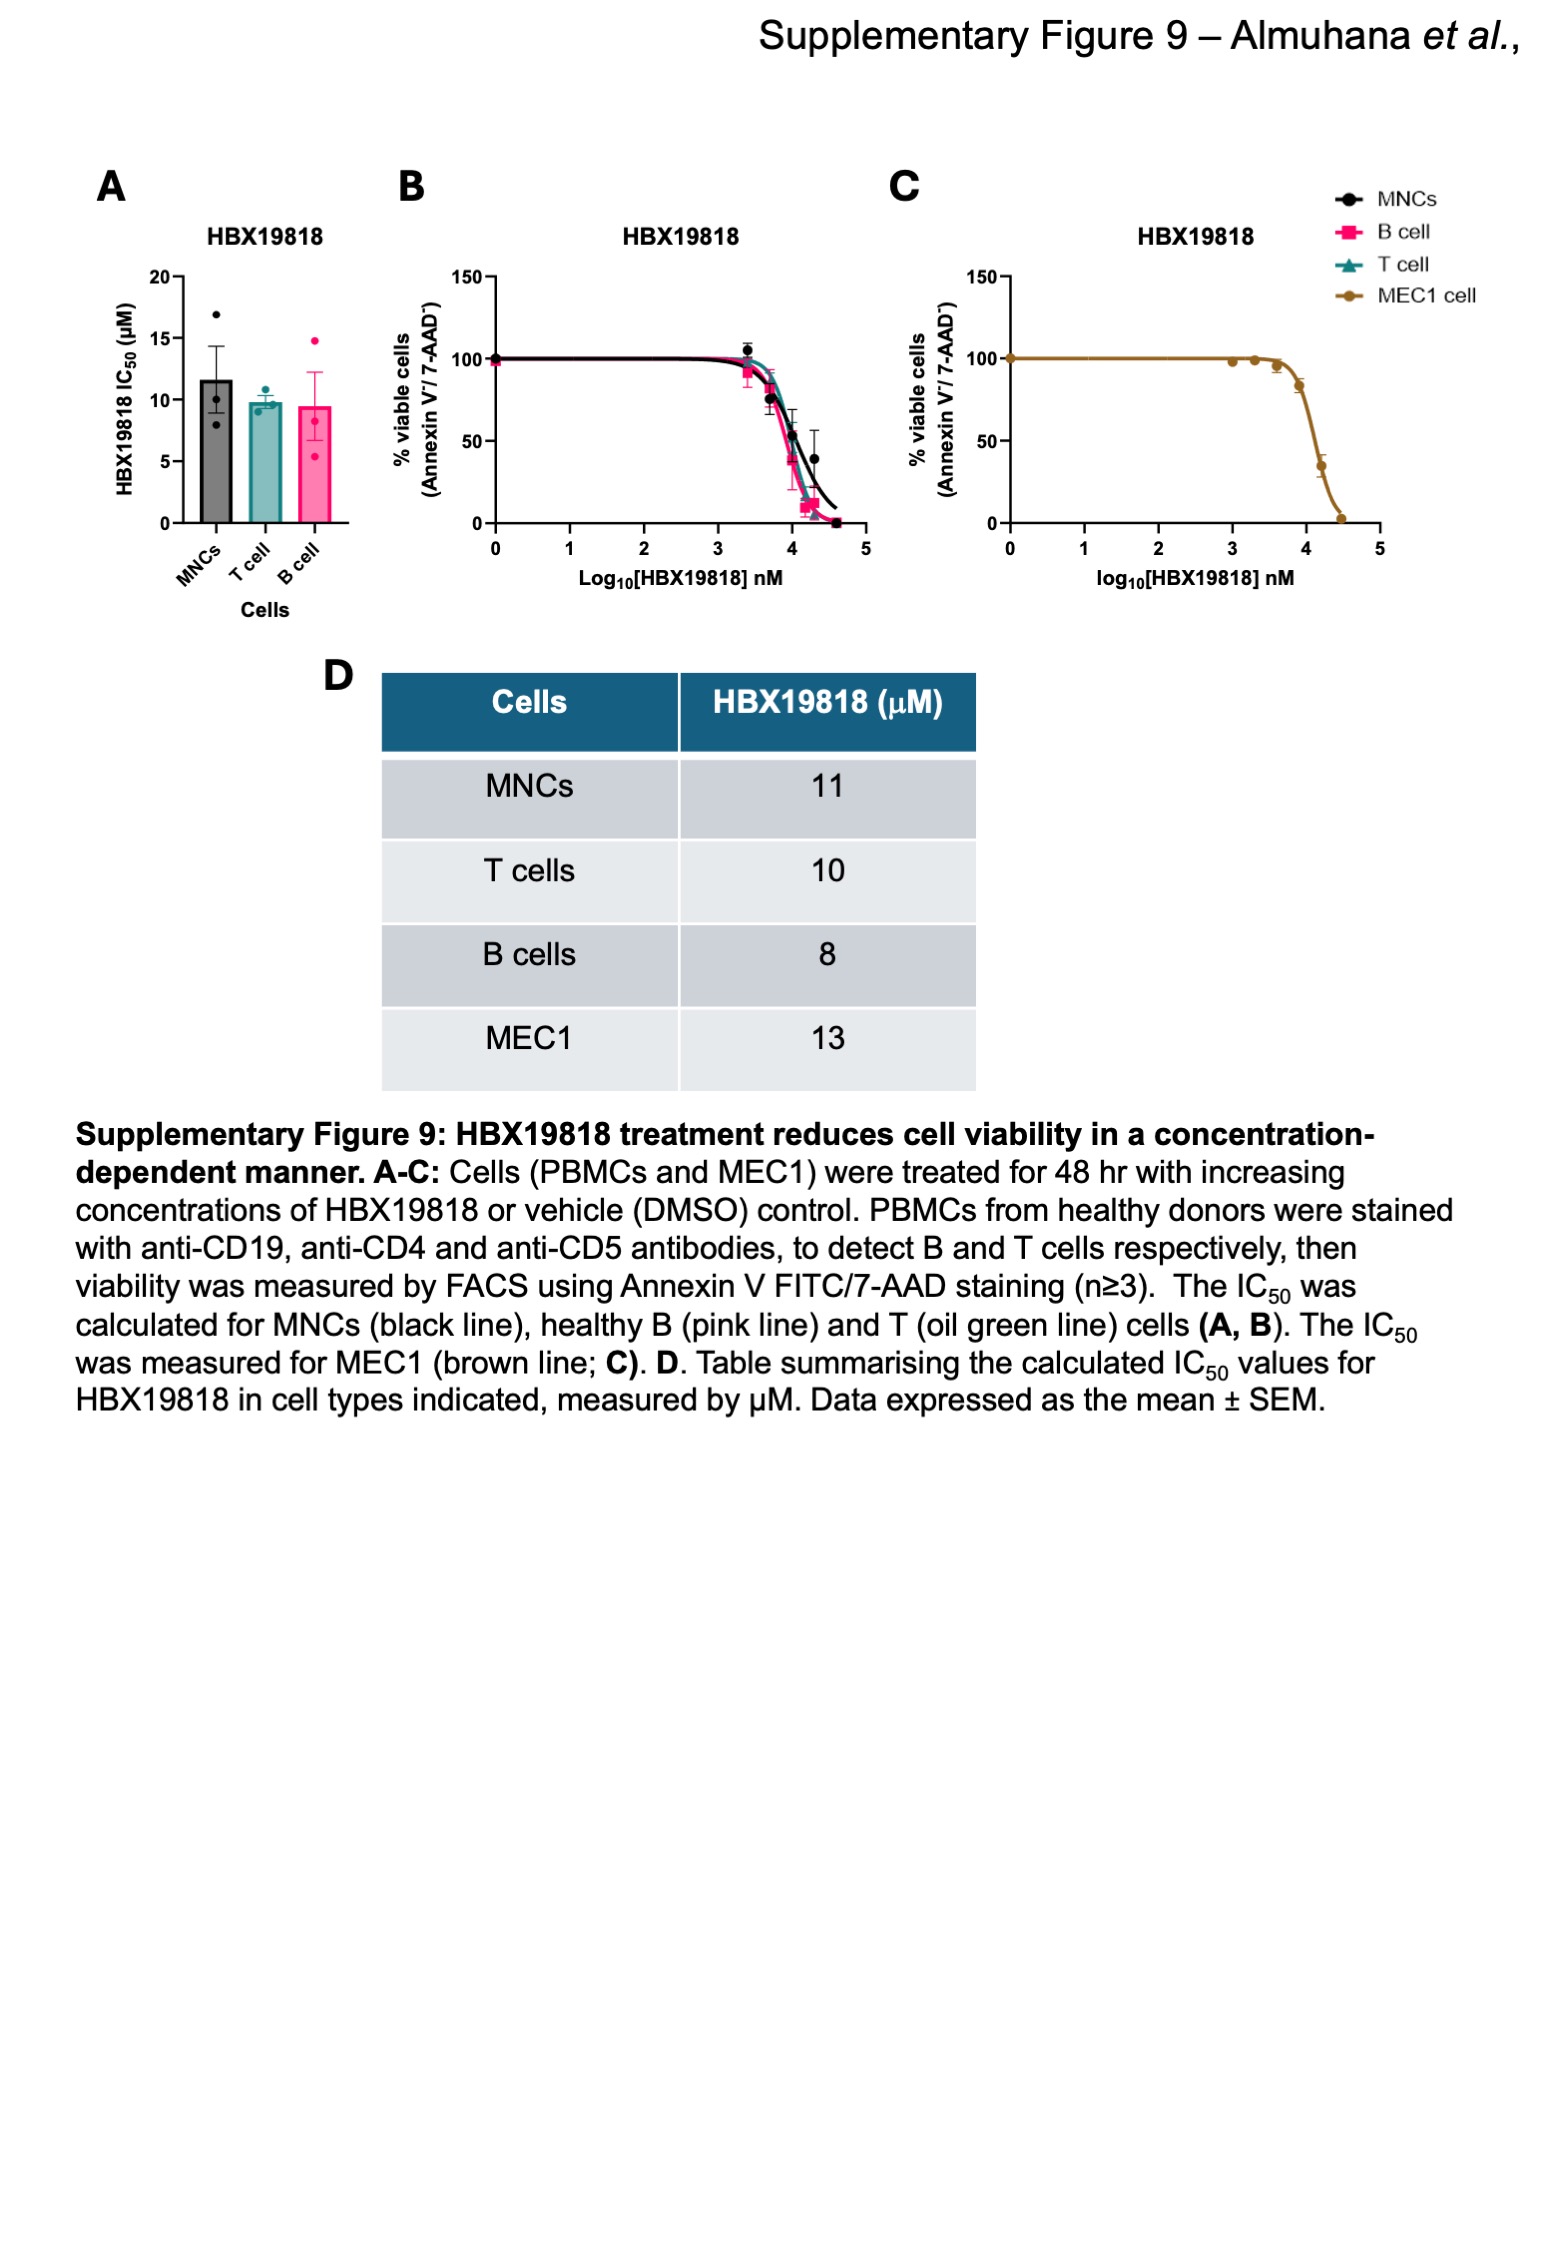


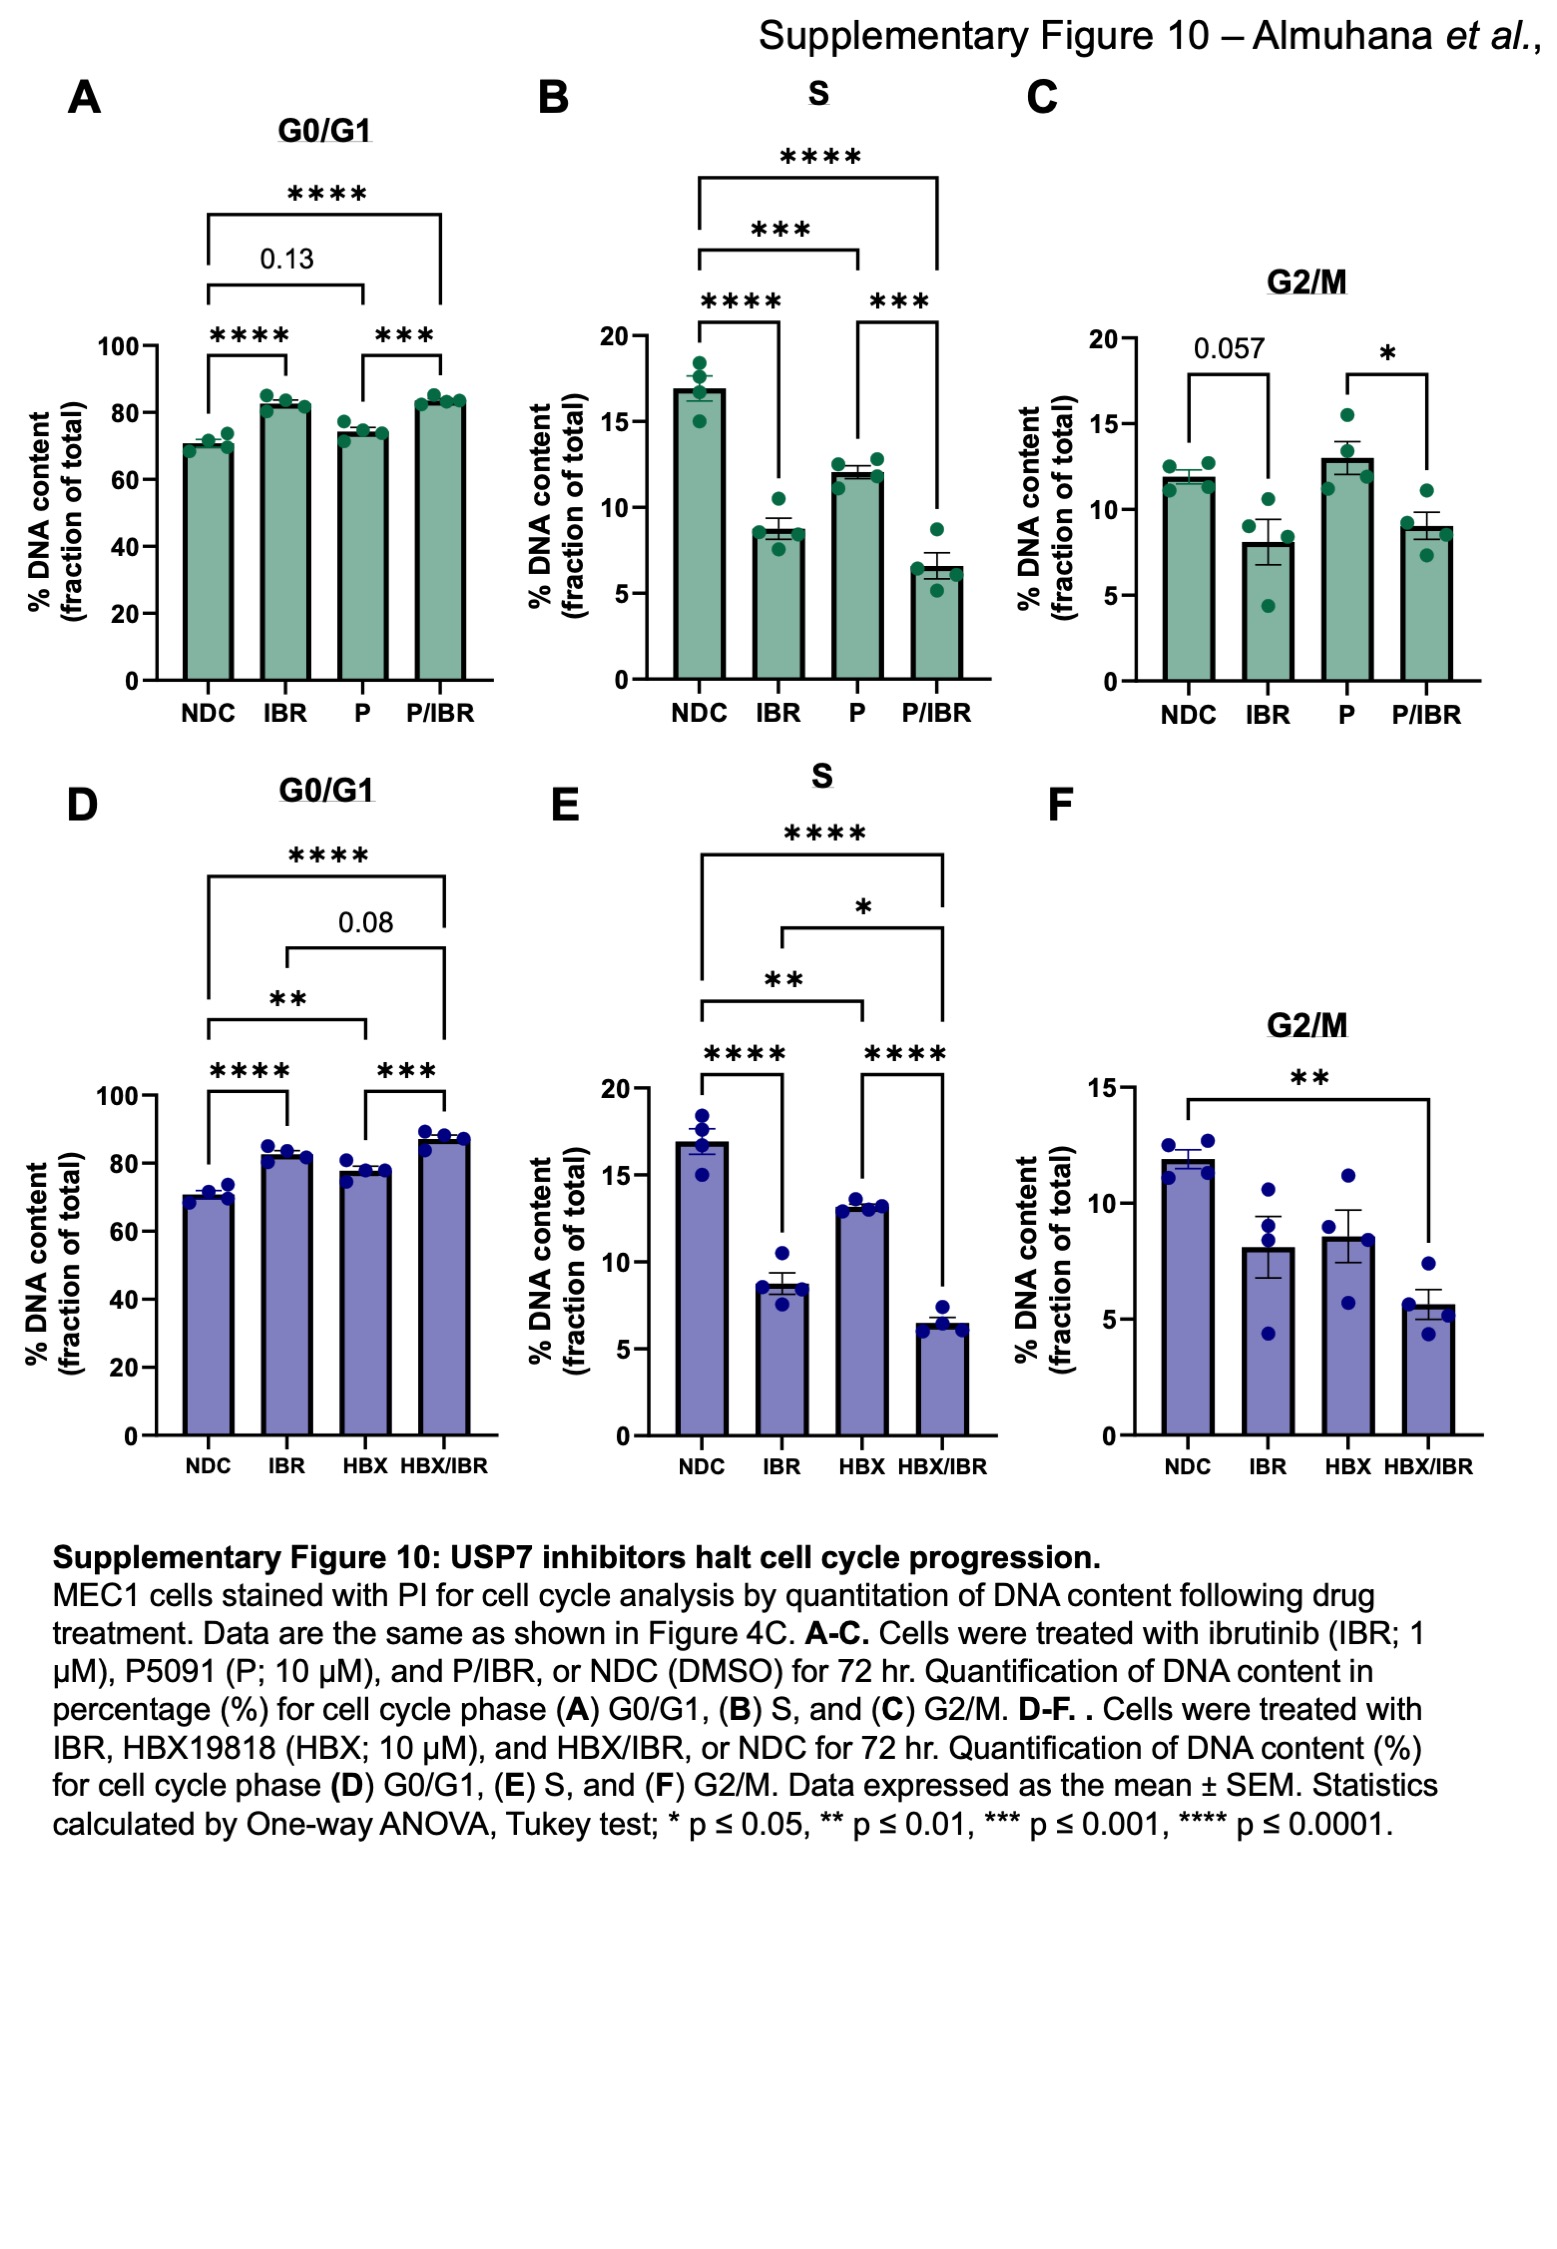


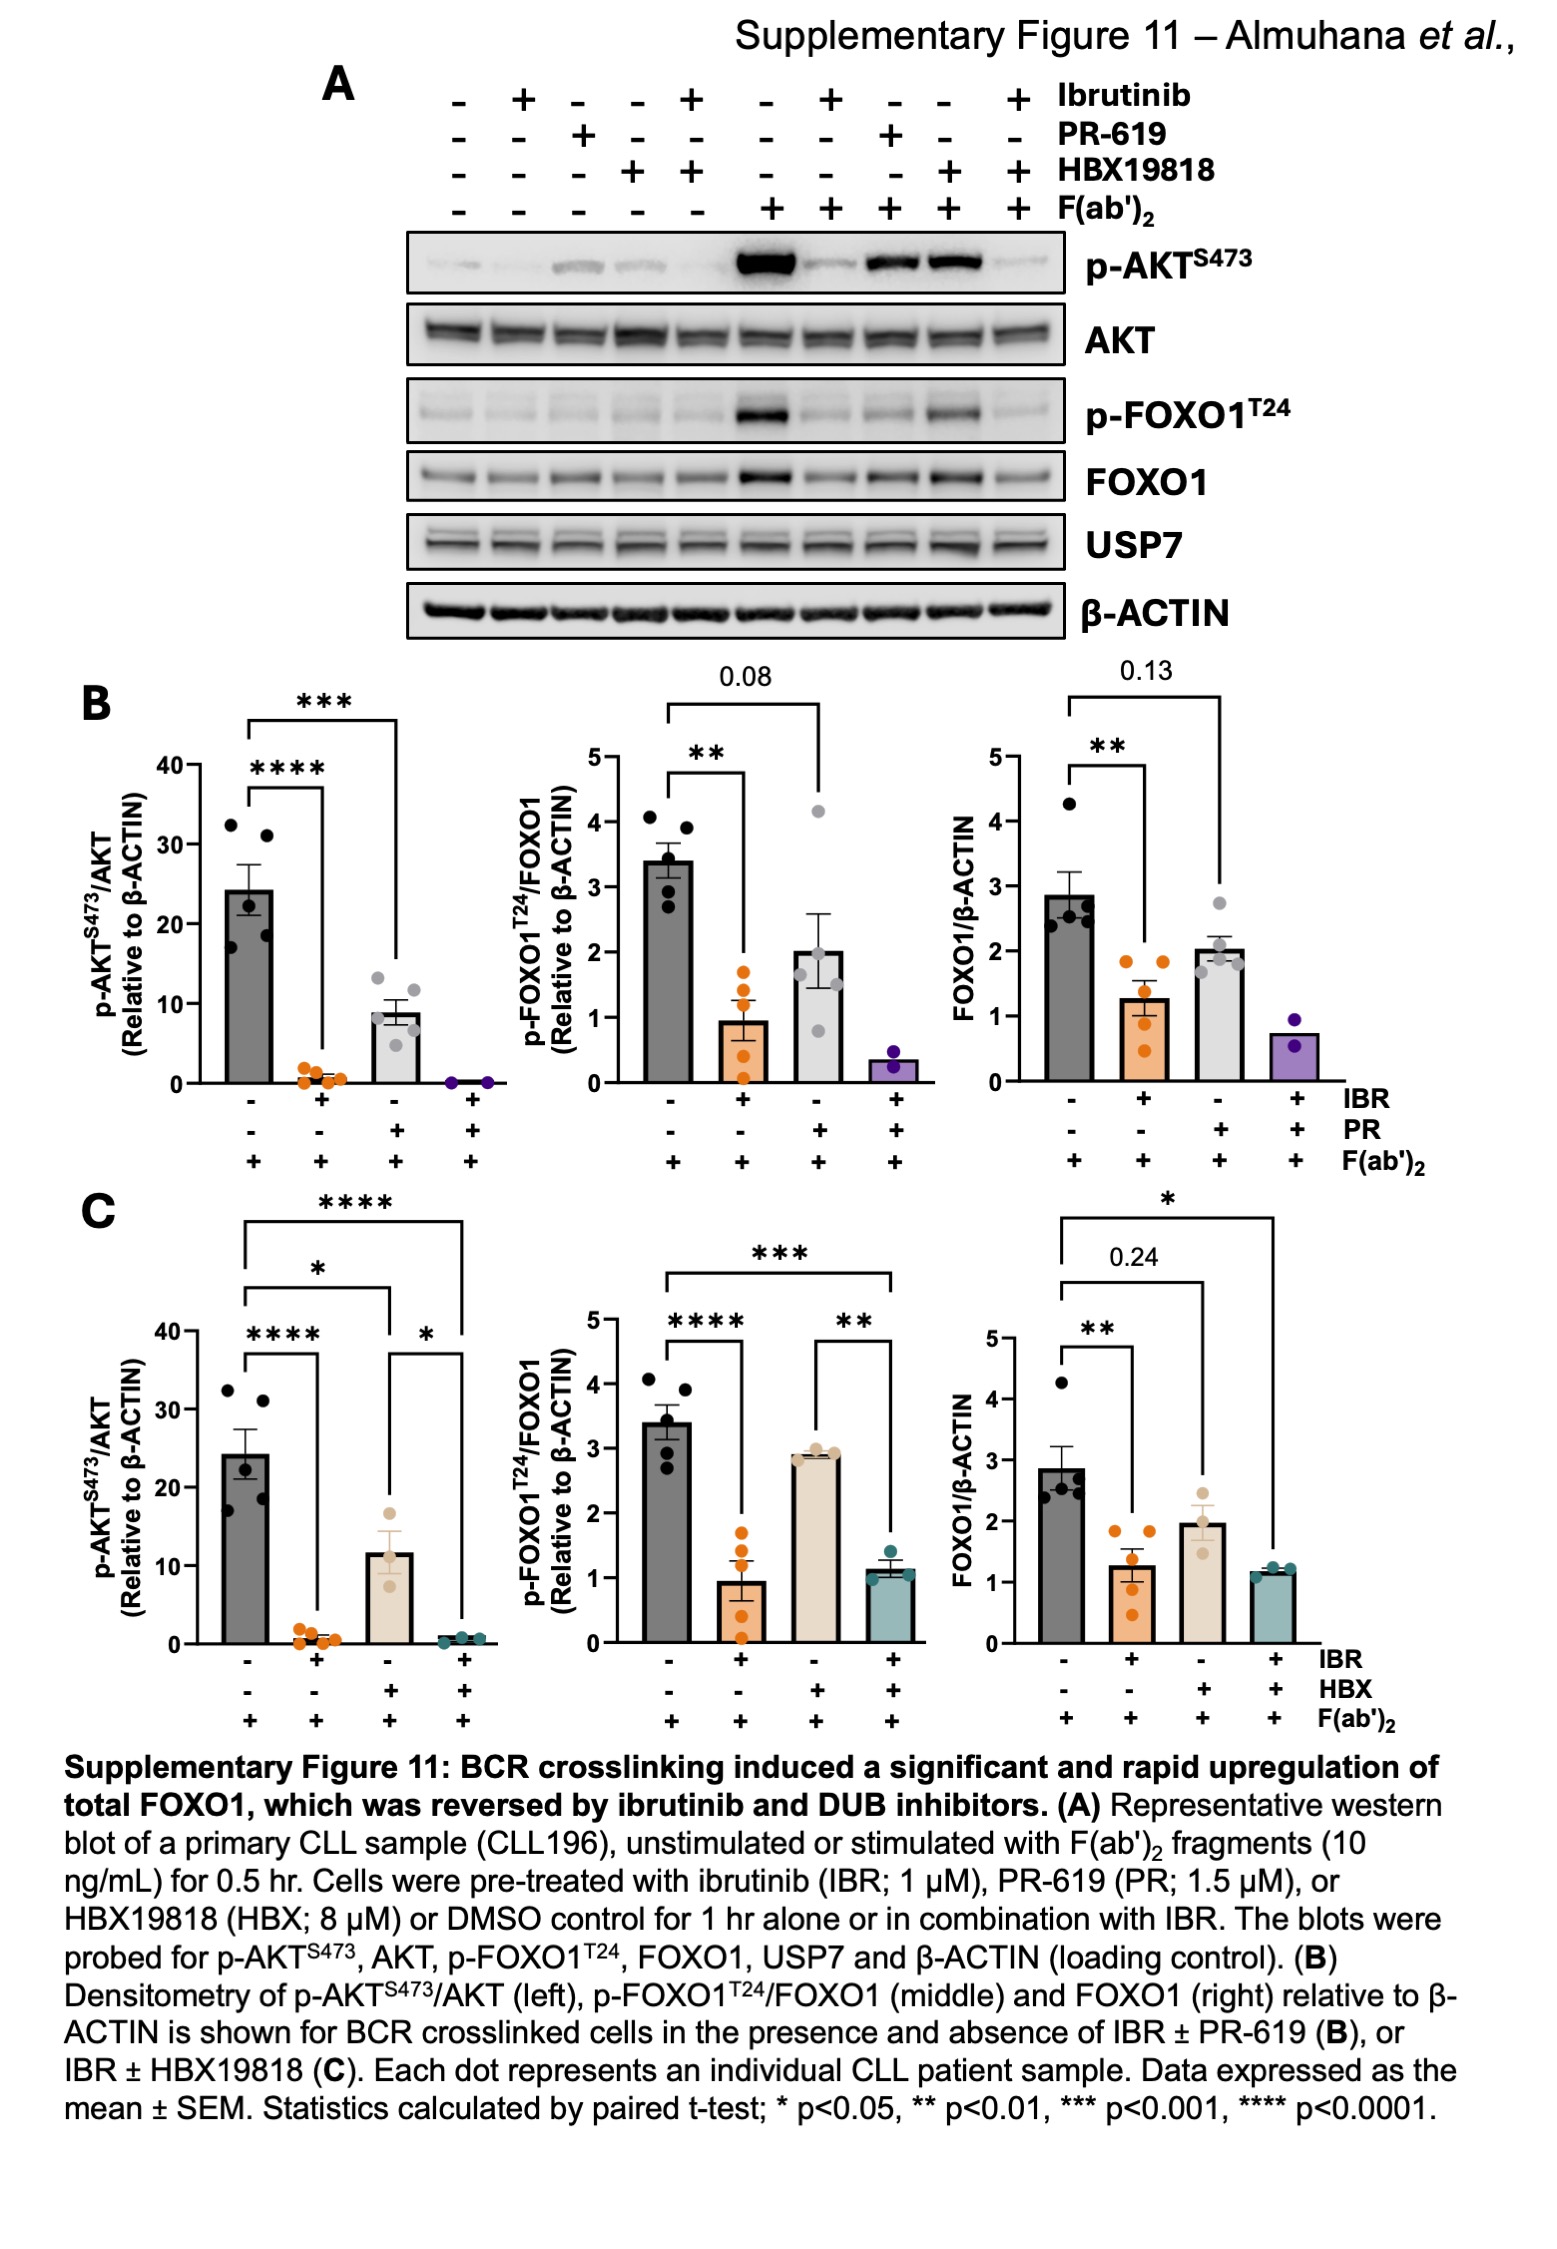


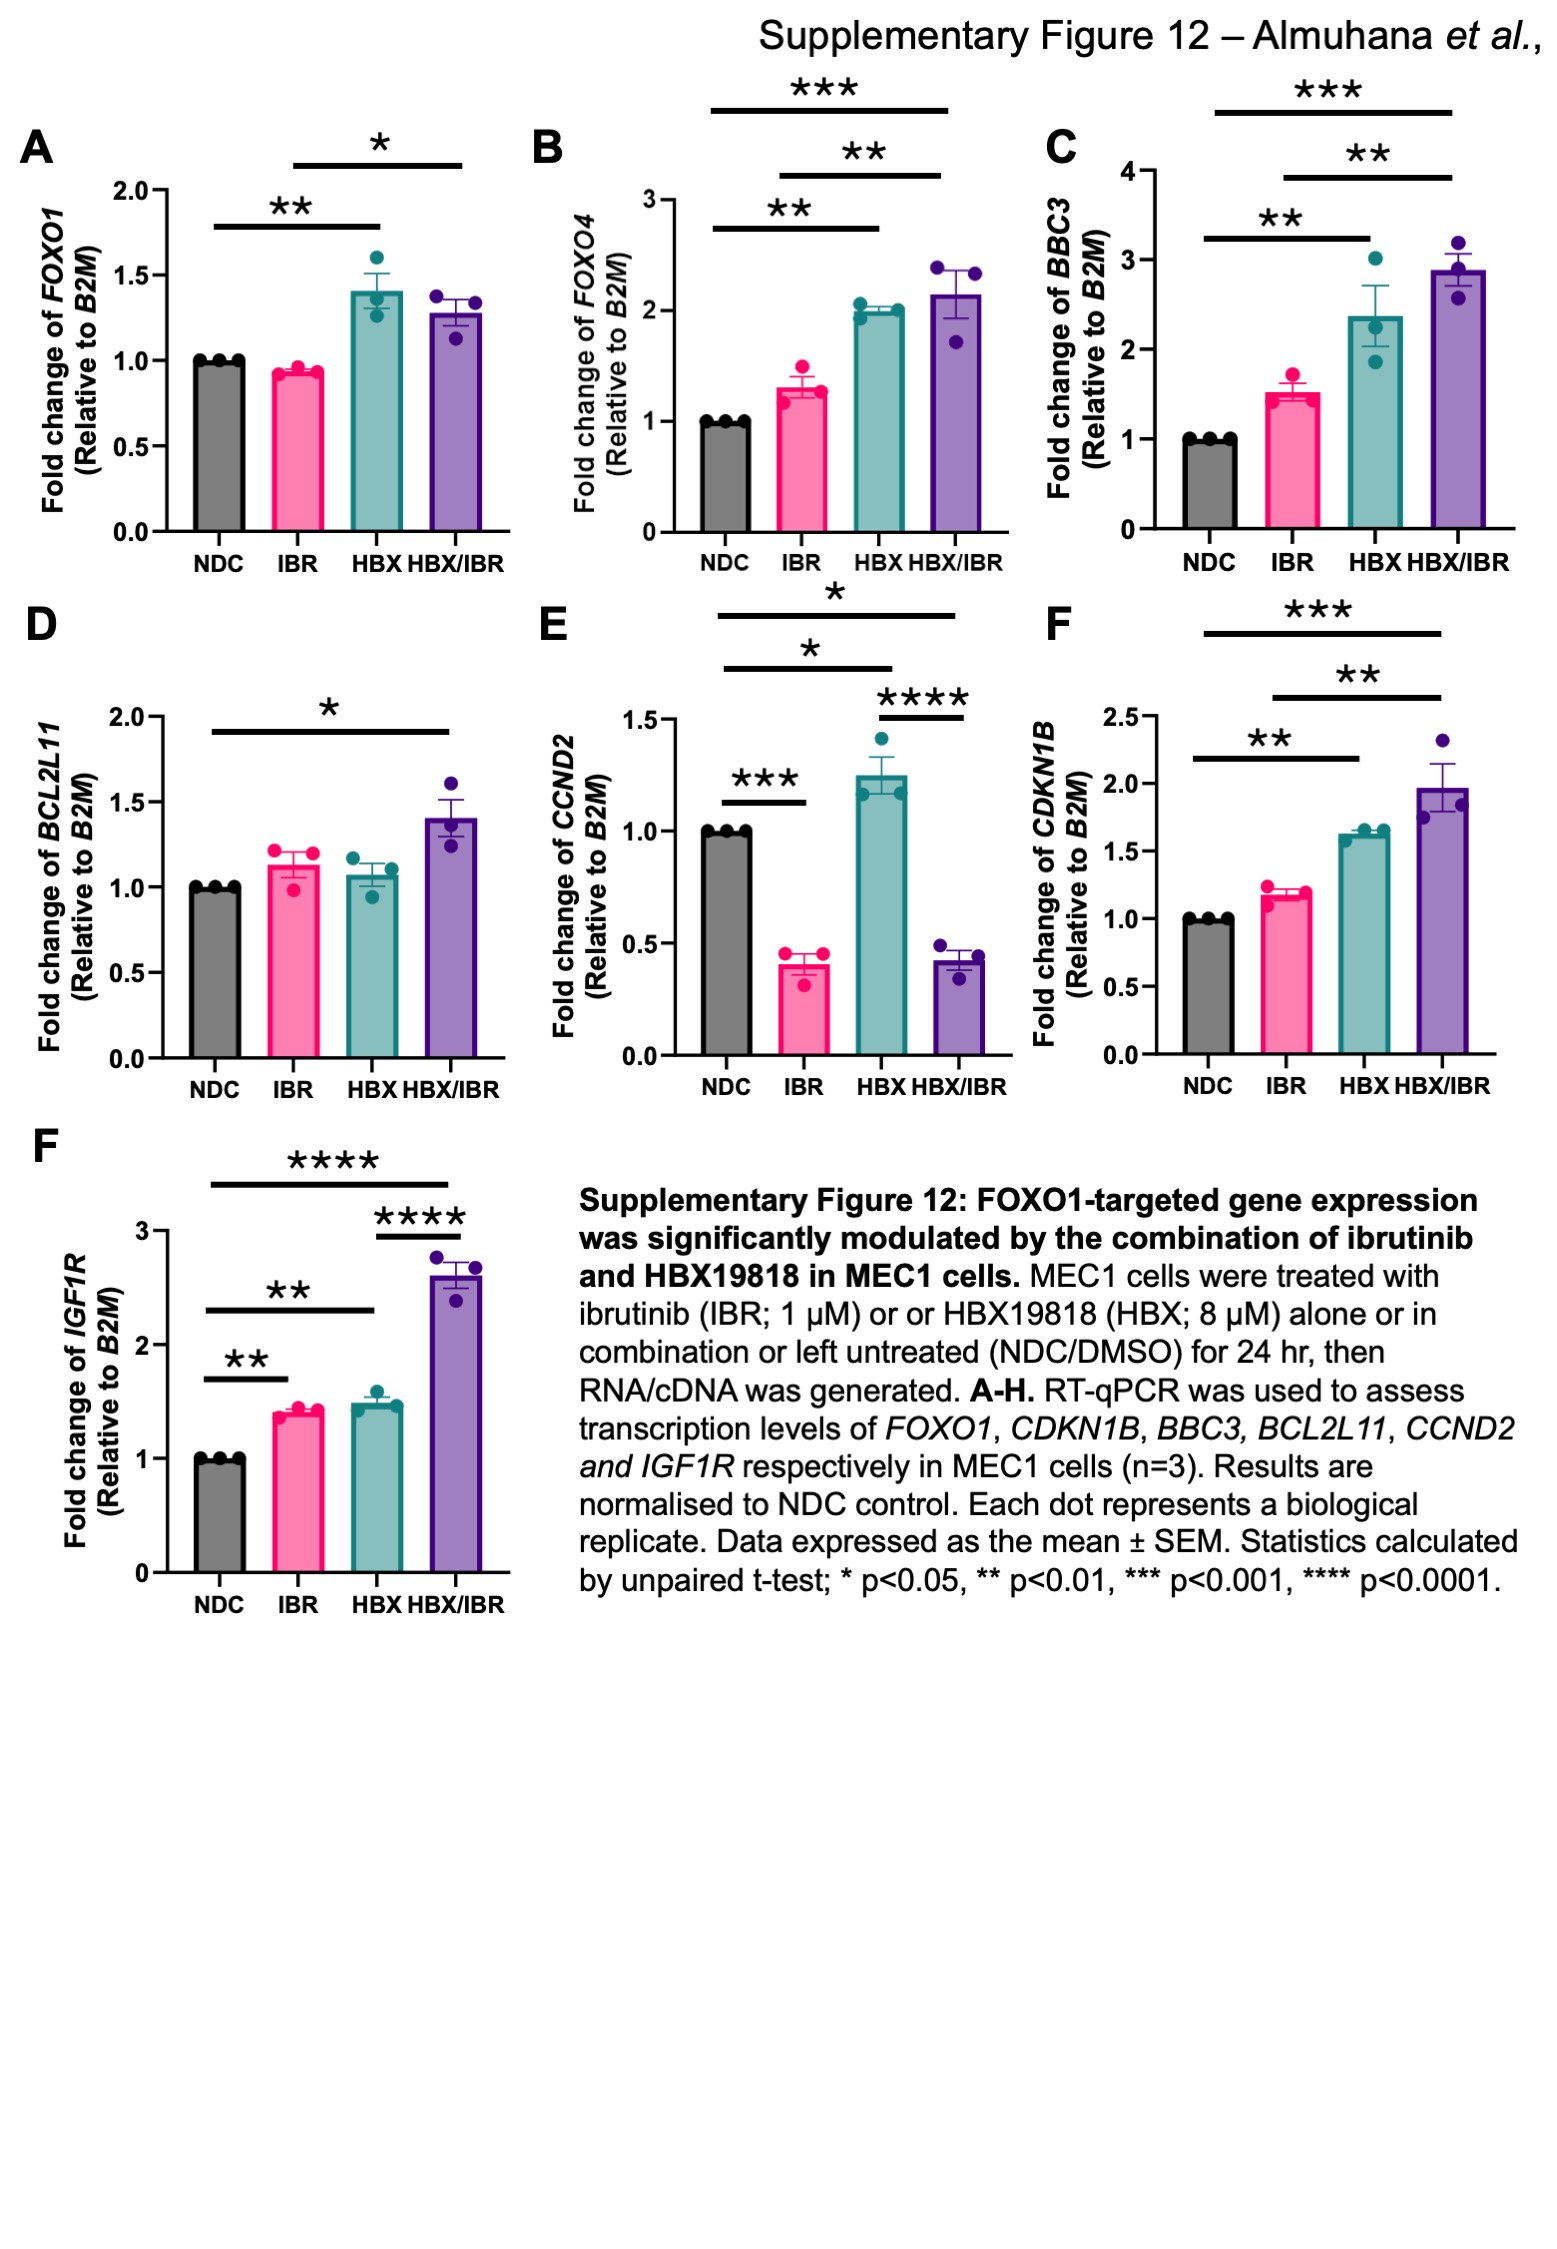

Supplement: Supplementary file 1 [file 9a26113524c0b2e145afe712.docx]
